# Supplementary figures and images for: The Evolution of Molybdenum Dependent Nitrogenase in Cyanobacteria
Source: MDPI journal article supplement (doi:10.3390/biology10040329), 2021-04-14

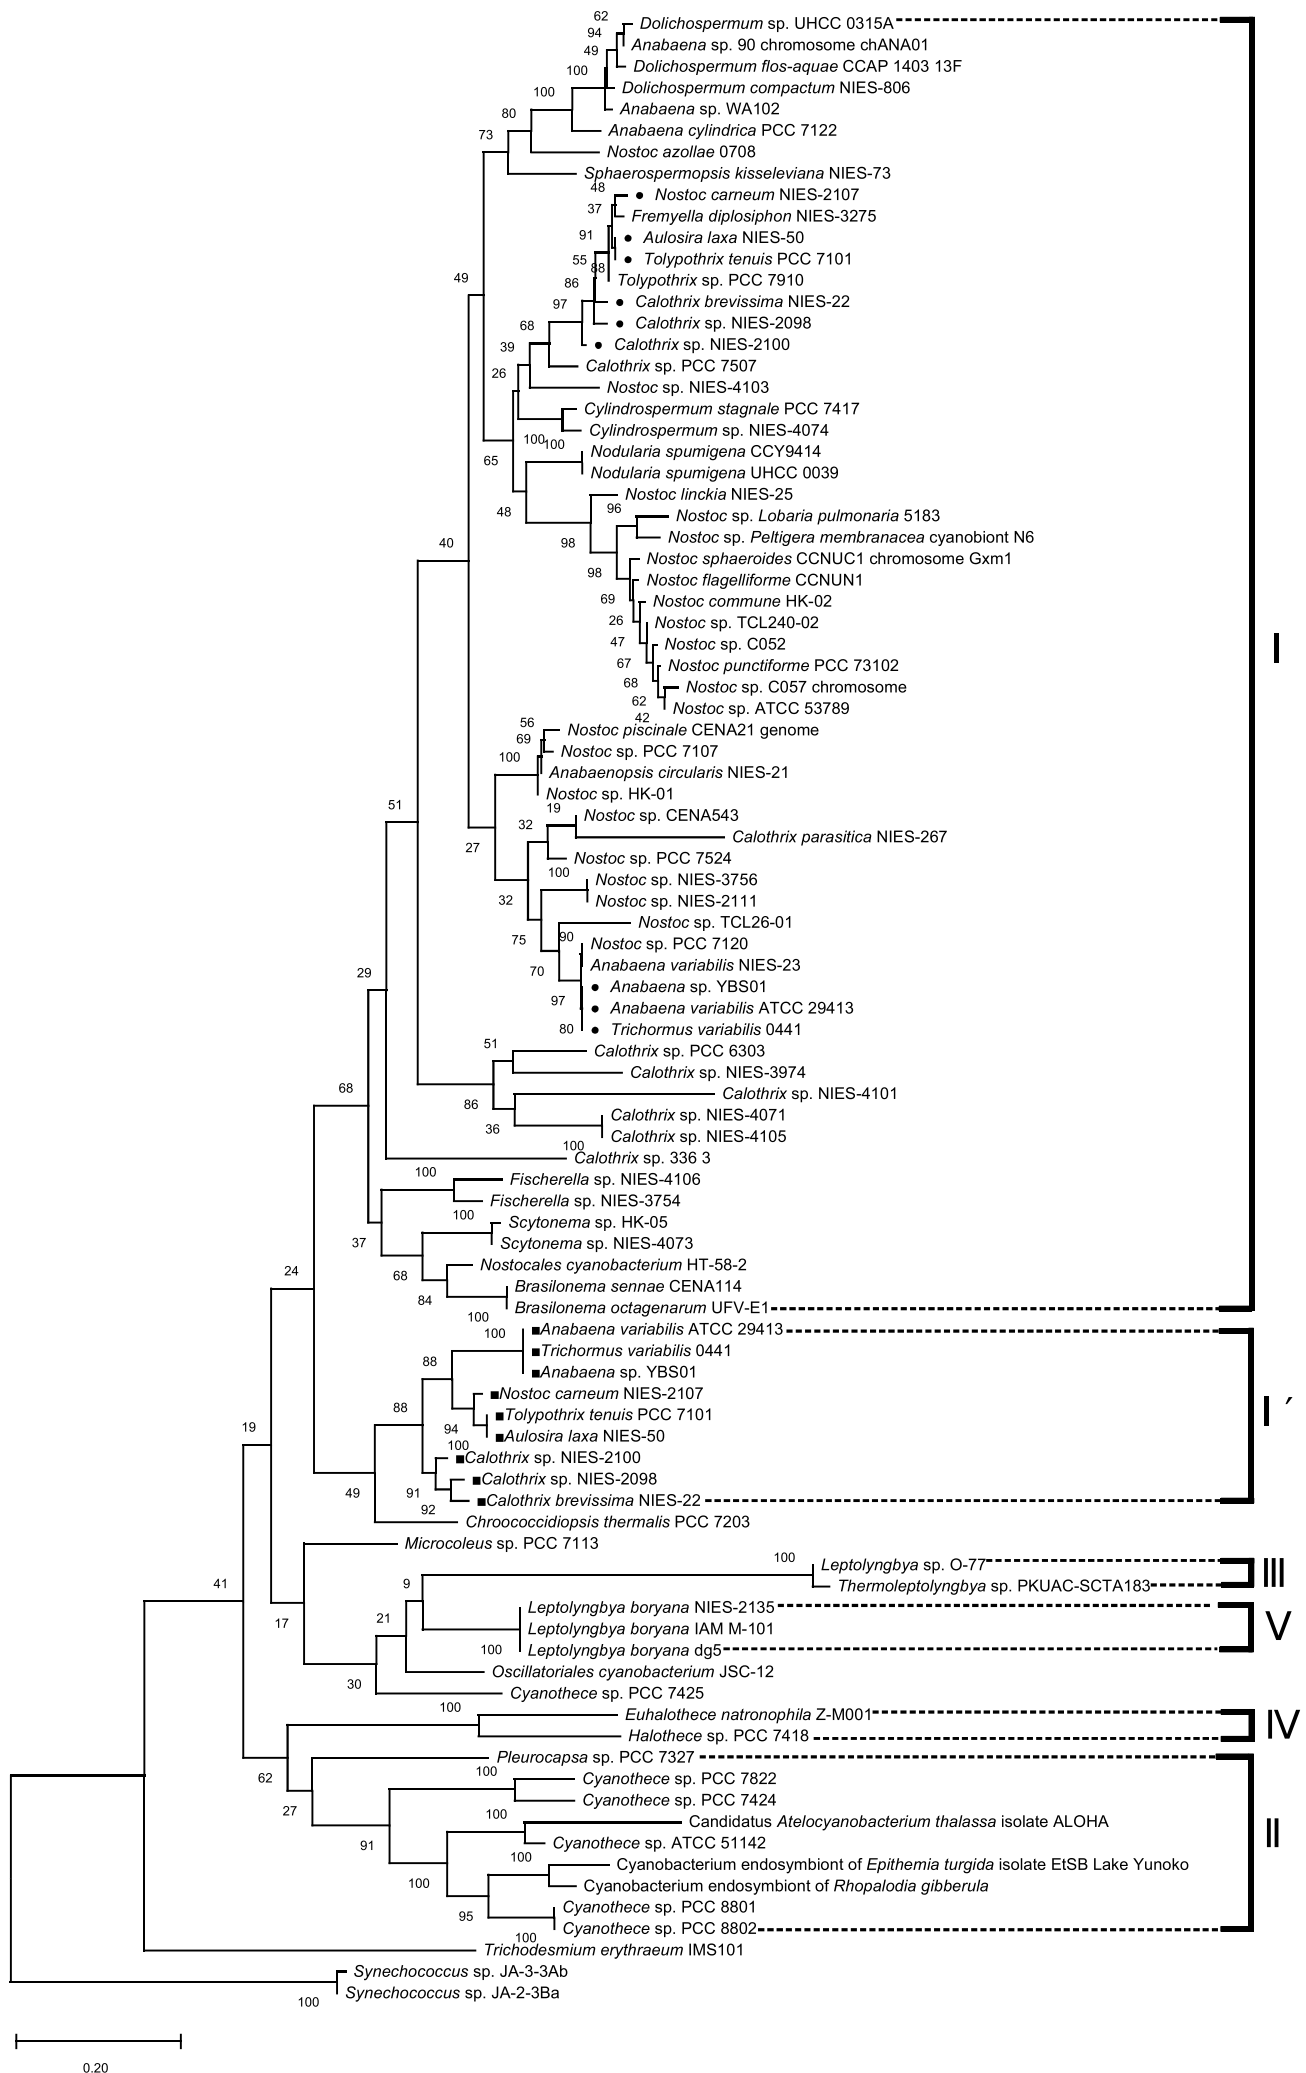

Figure S2a Phylogenetic tree of *nifB*

Supplement: s1 [file s1]

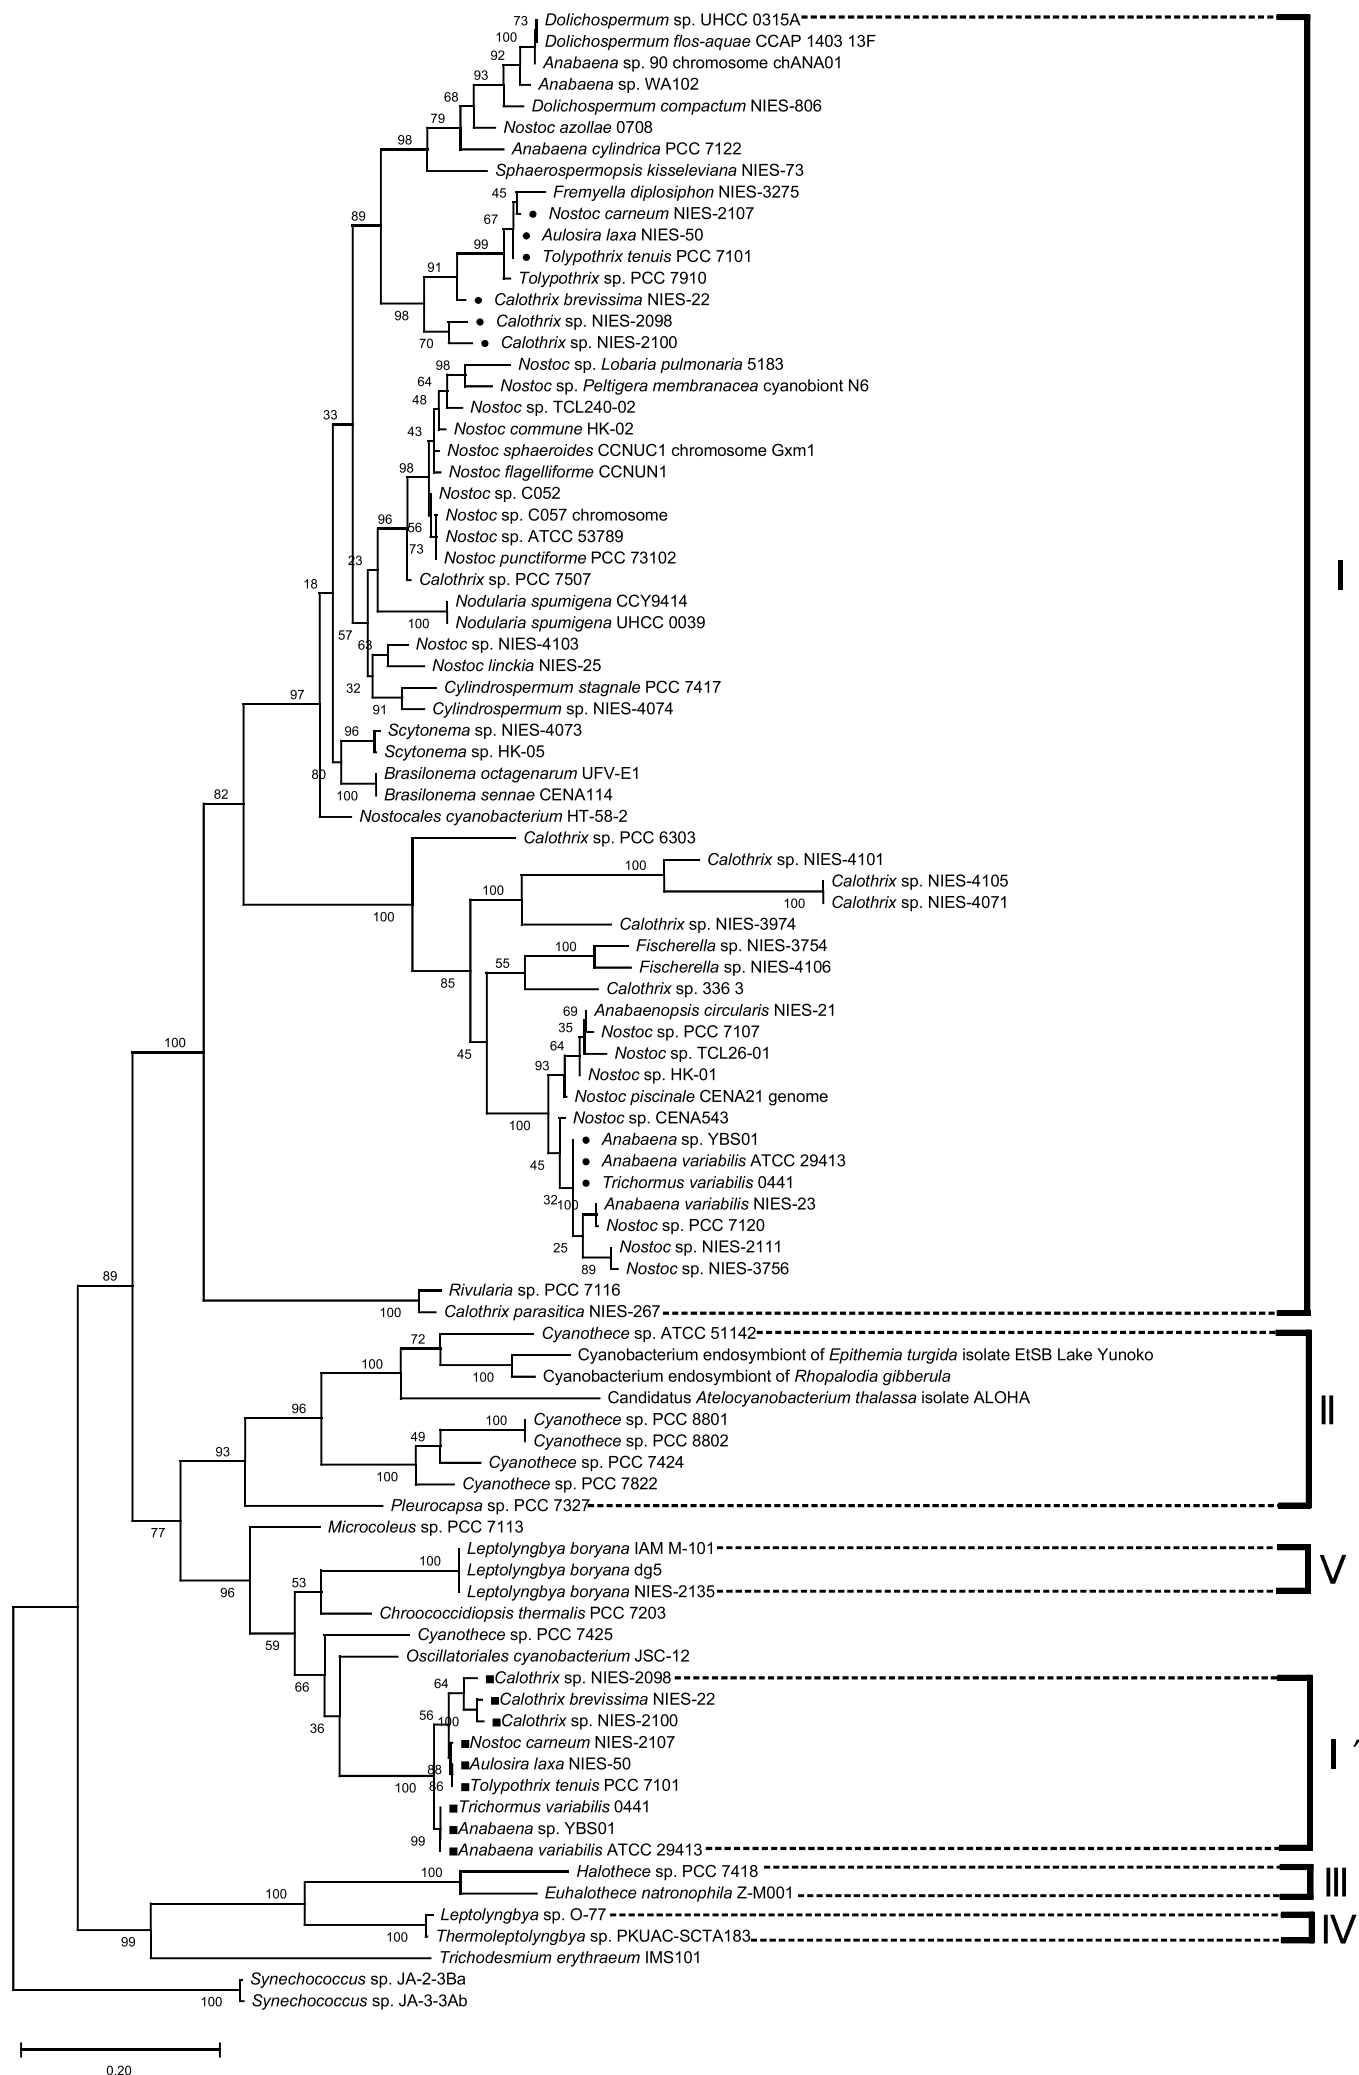

Figure S2f Phylogenetic tree of *nifK*

Supplement: s1 [file s1]

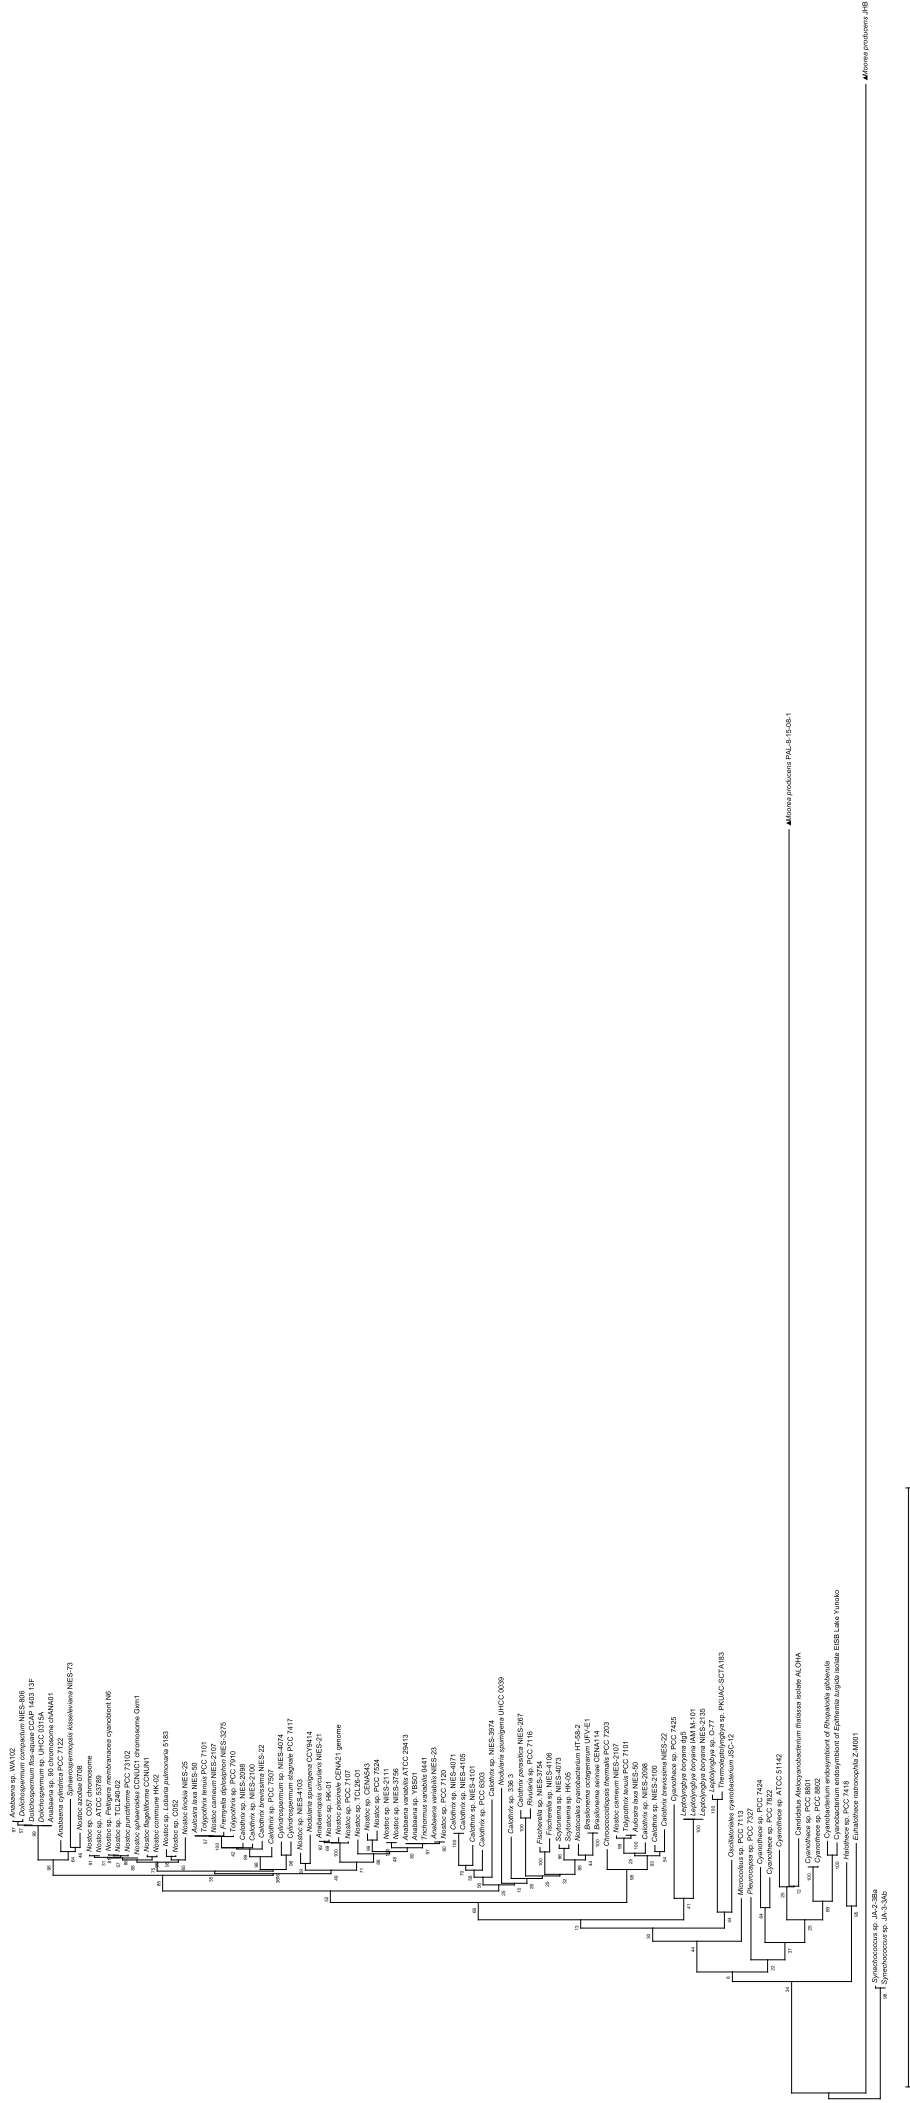

Figure S3b Phylogenetic tree of *nifV* for diazotrophic and non-diazotrophic Cyanobacteria

Supplement: s1 [file s1]

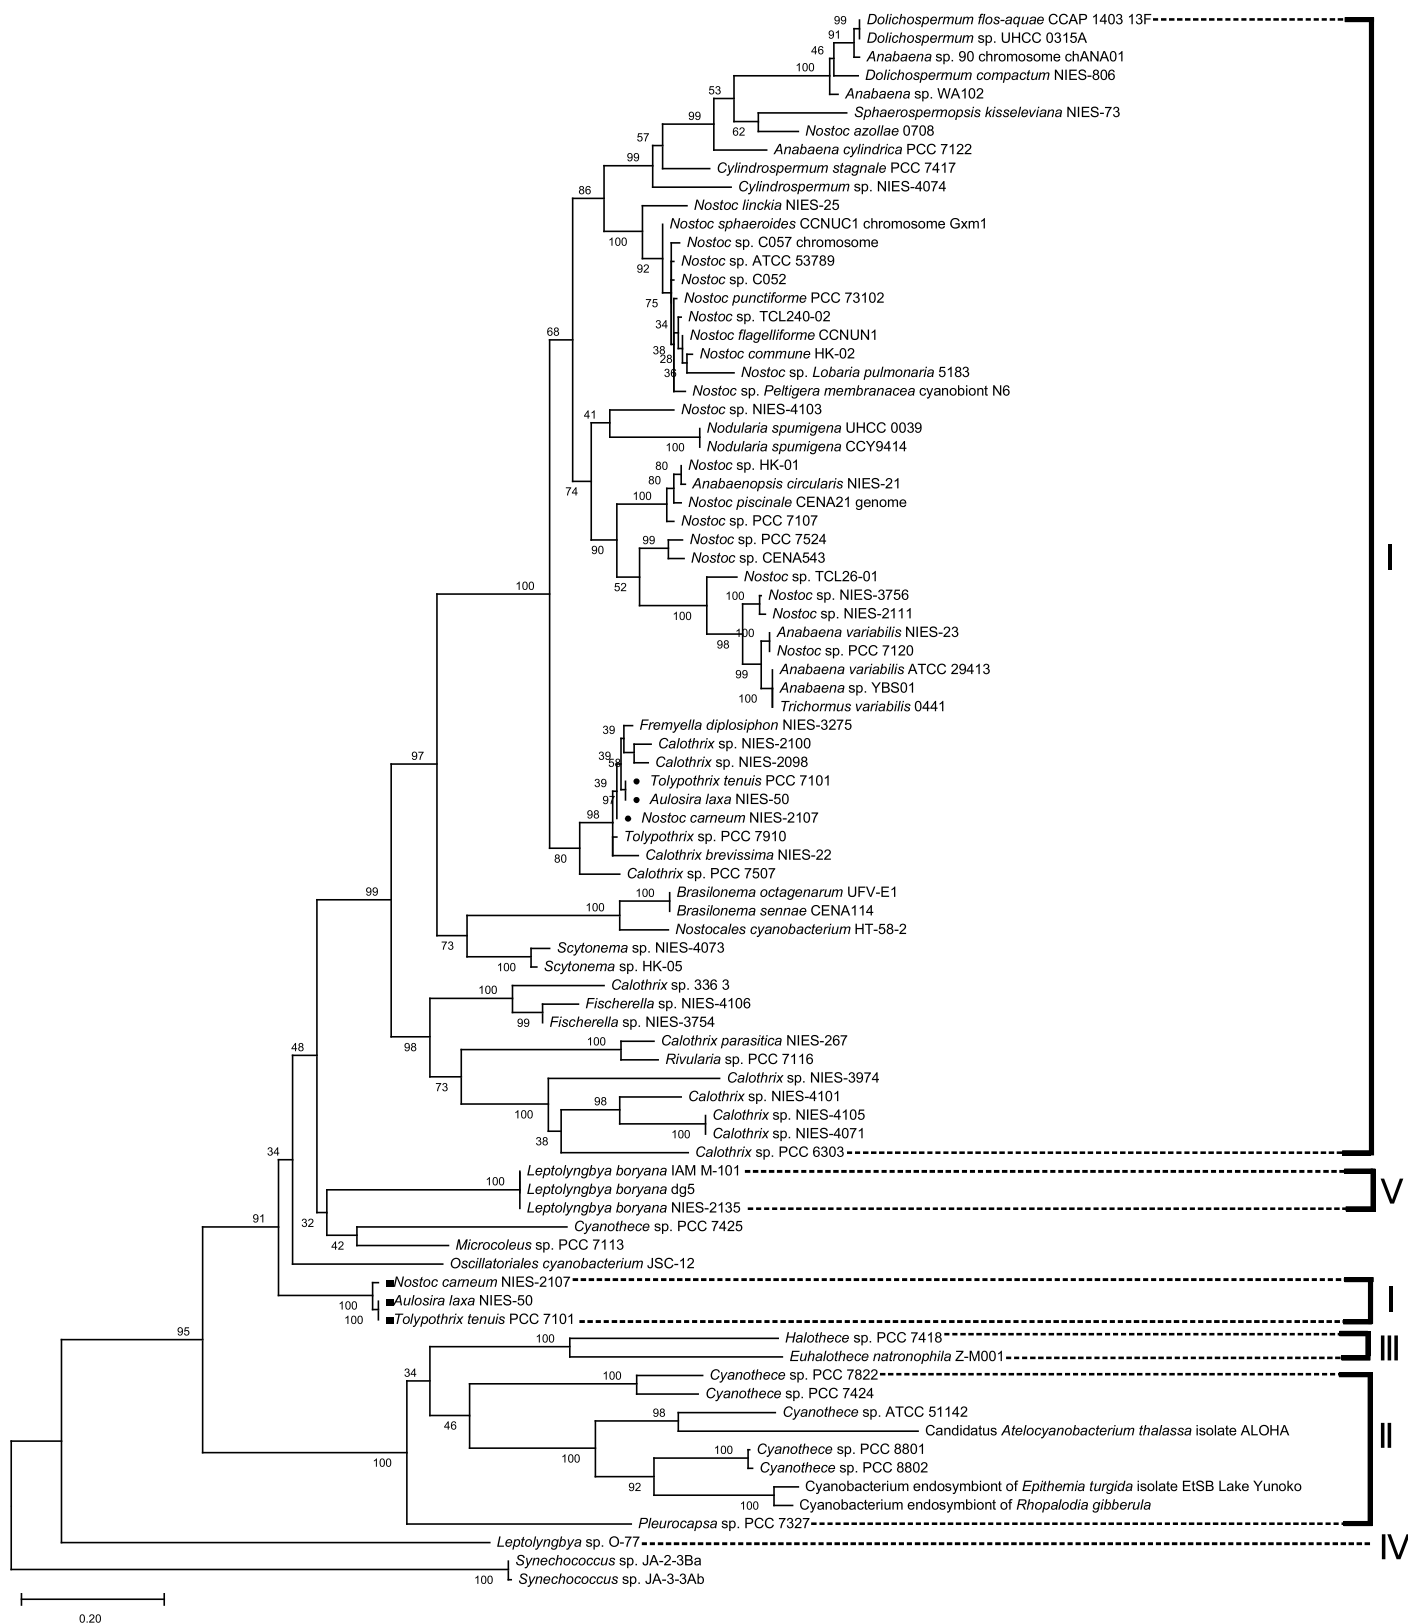

Figure S2k Phylogenetic tree of *nifH*

Supplement: s1 [file s1]

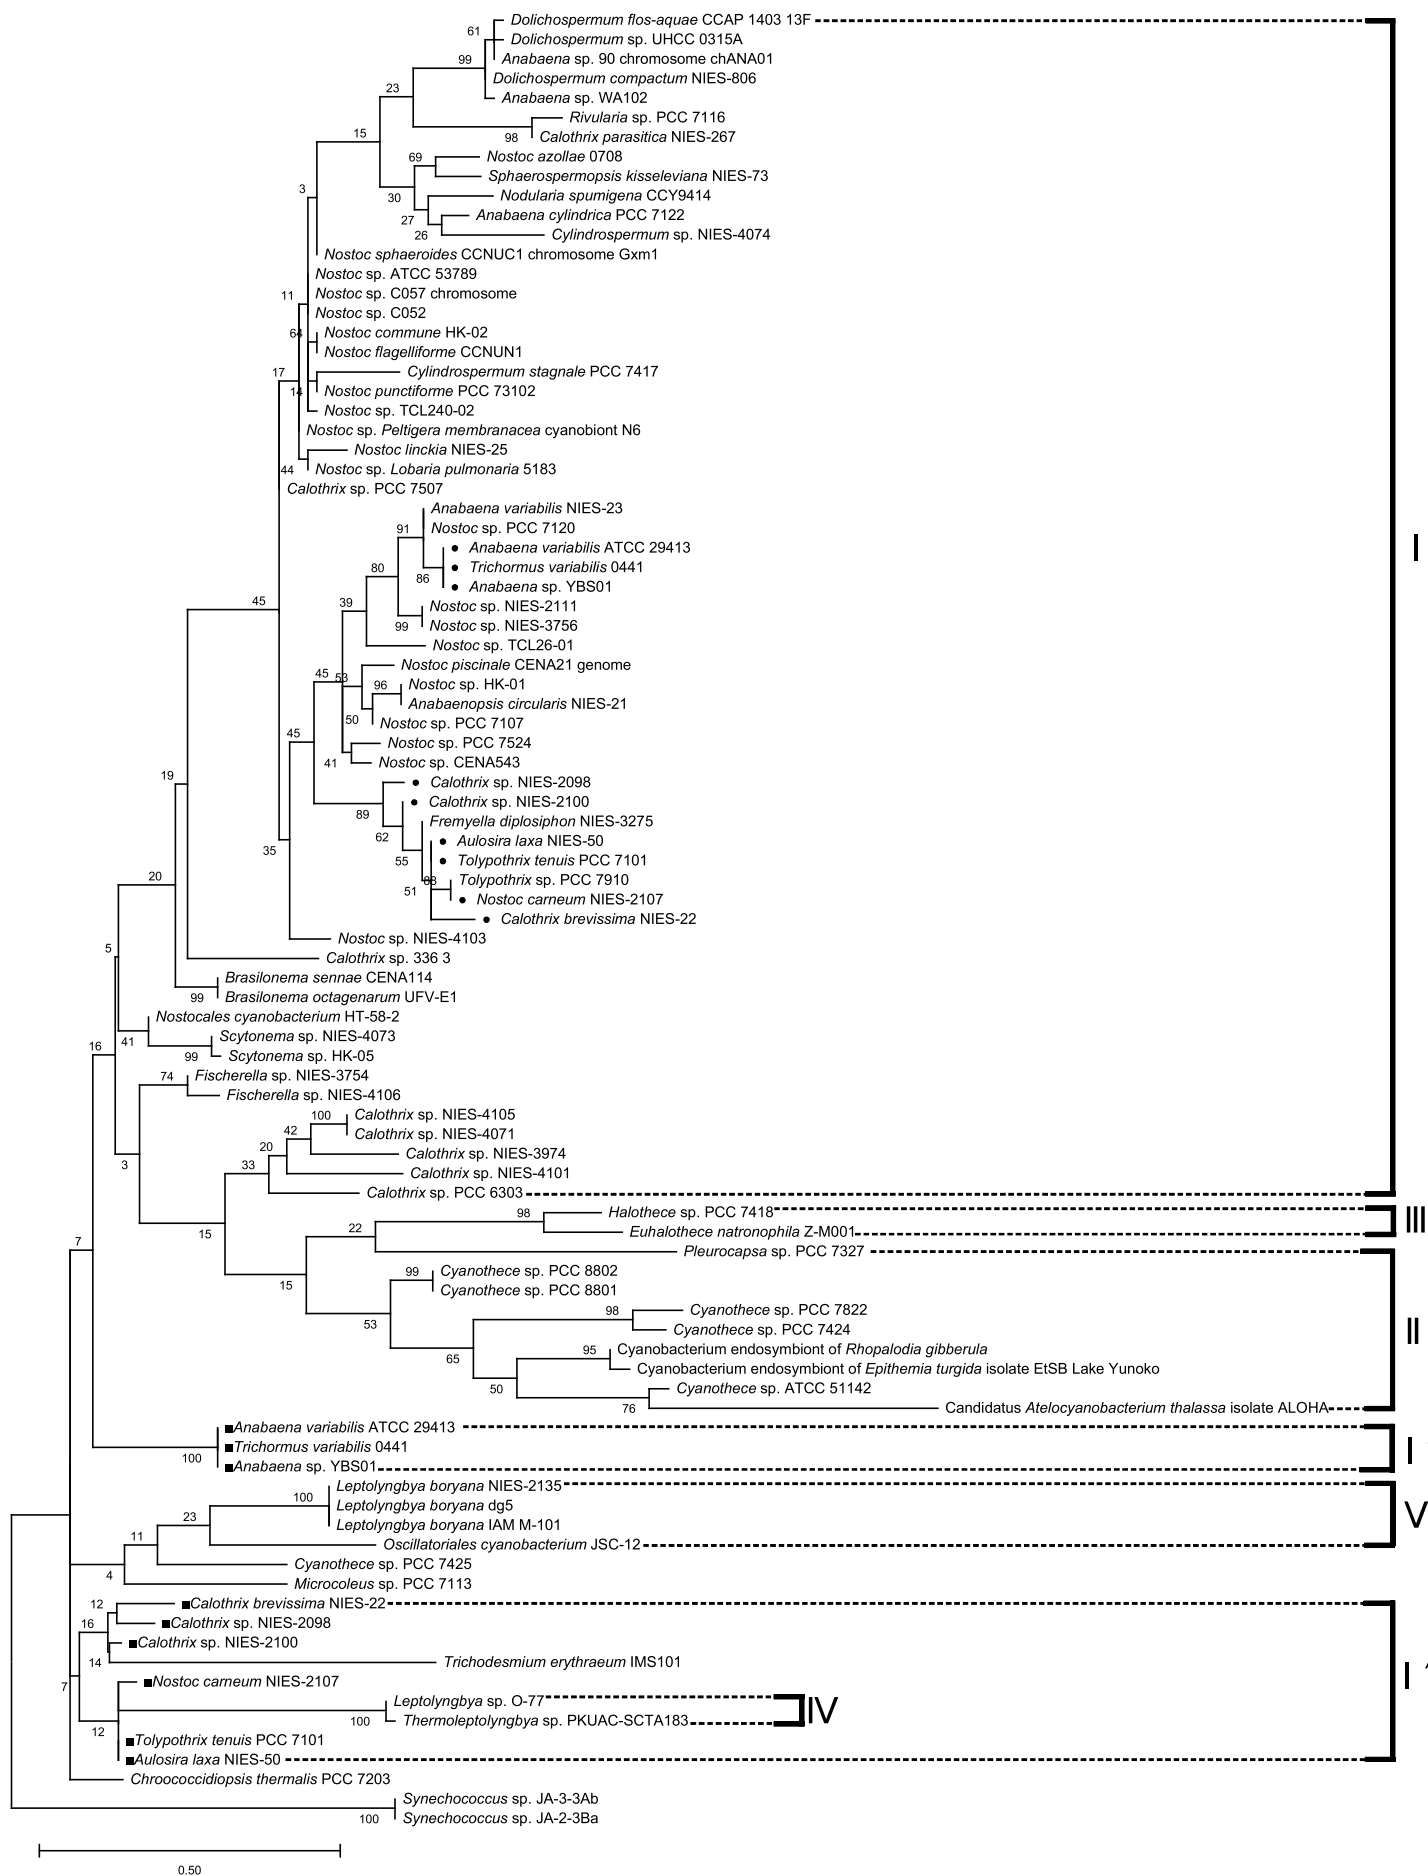

Figure S2i Phylogenetic tree of *nifT*

Supplement: s1 [file s1]

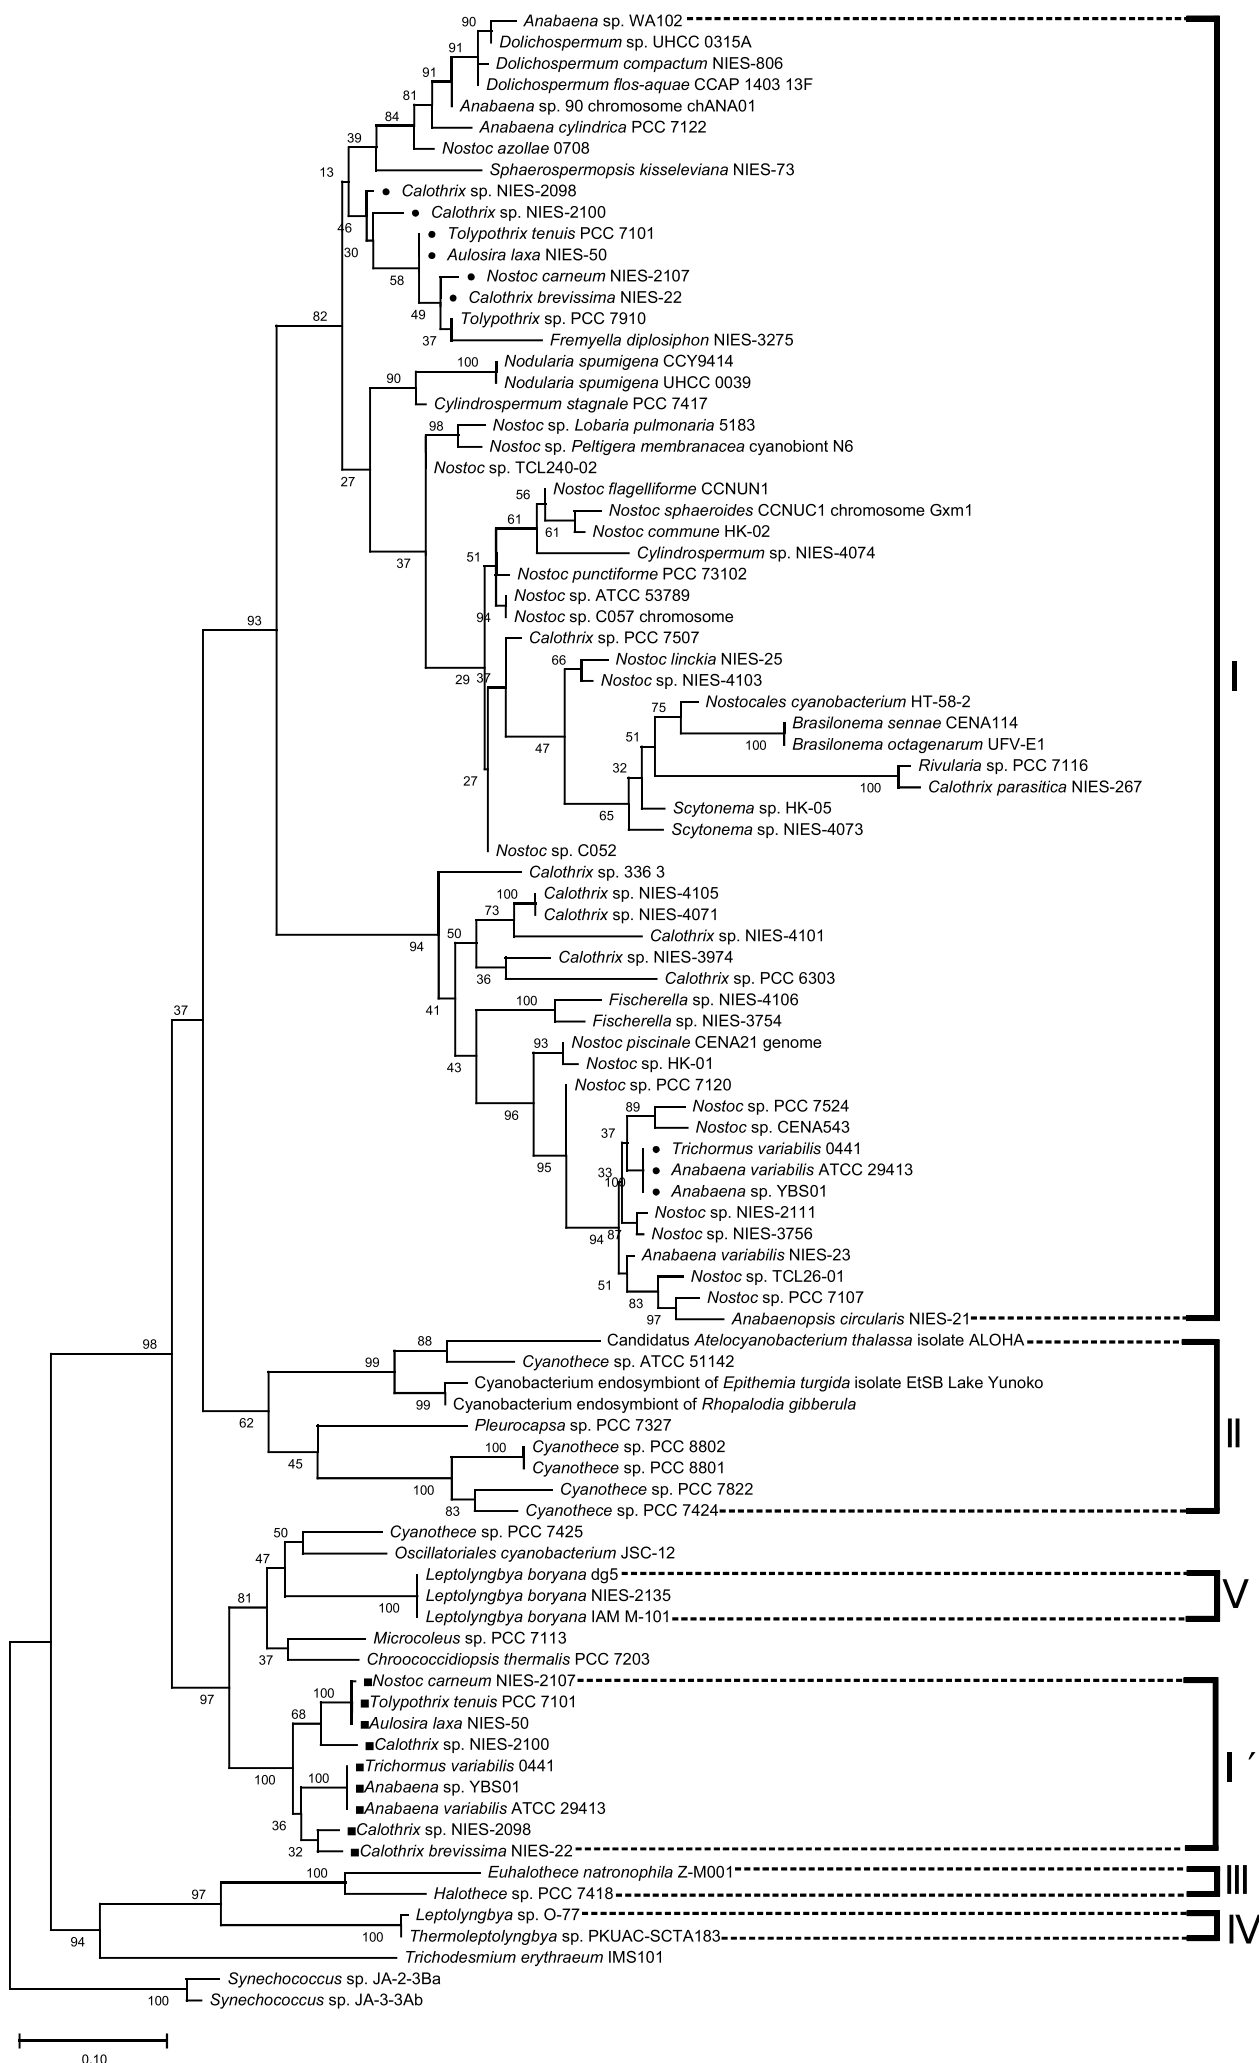

Figure S2e Phylogenetic tree of *nifD*

Supplement: s1 [file s1]

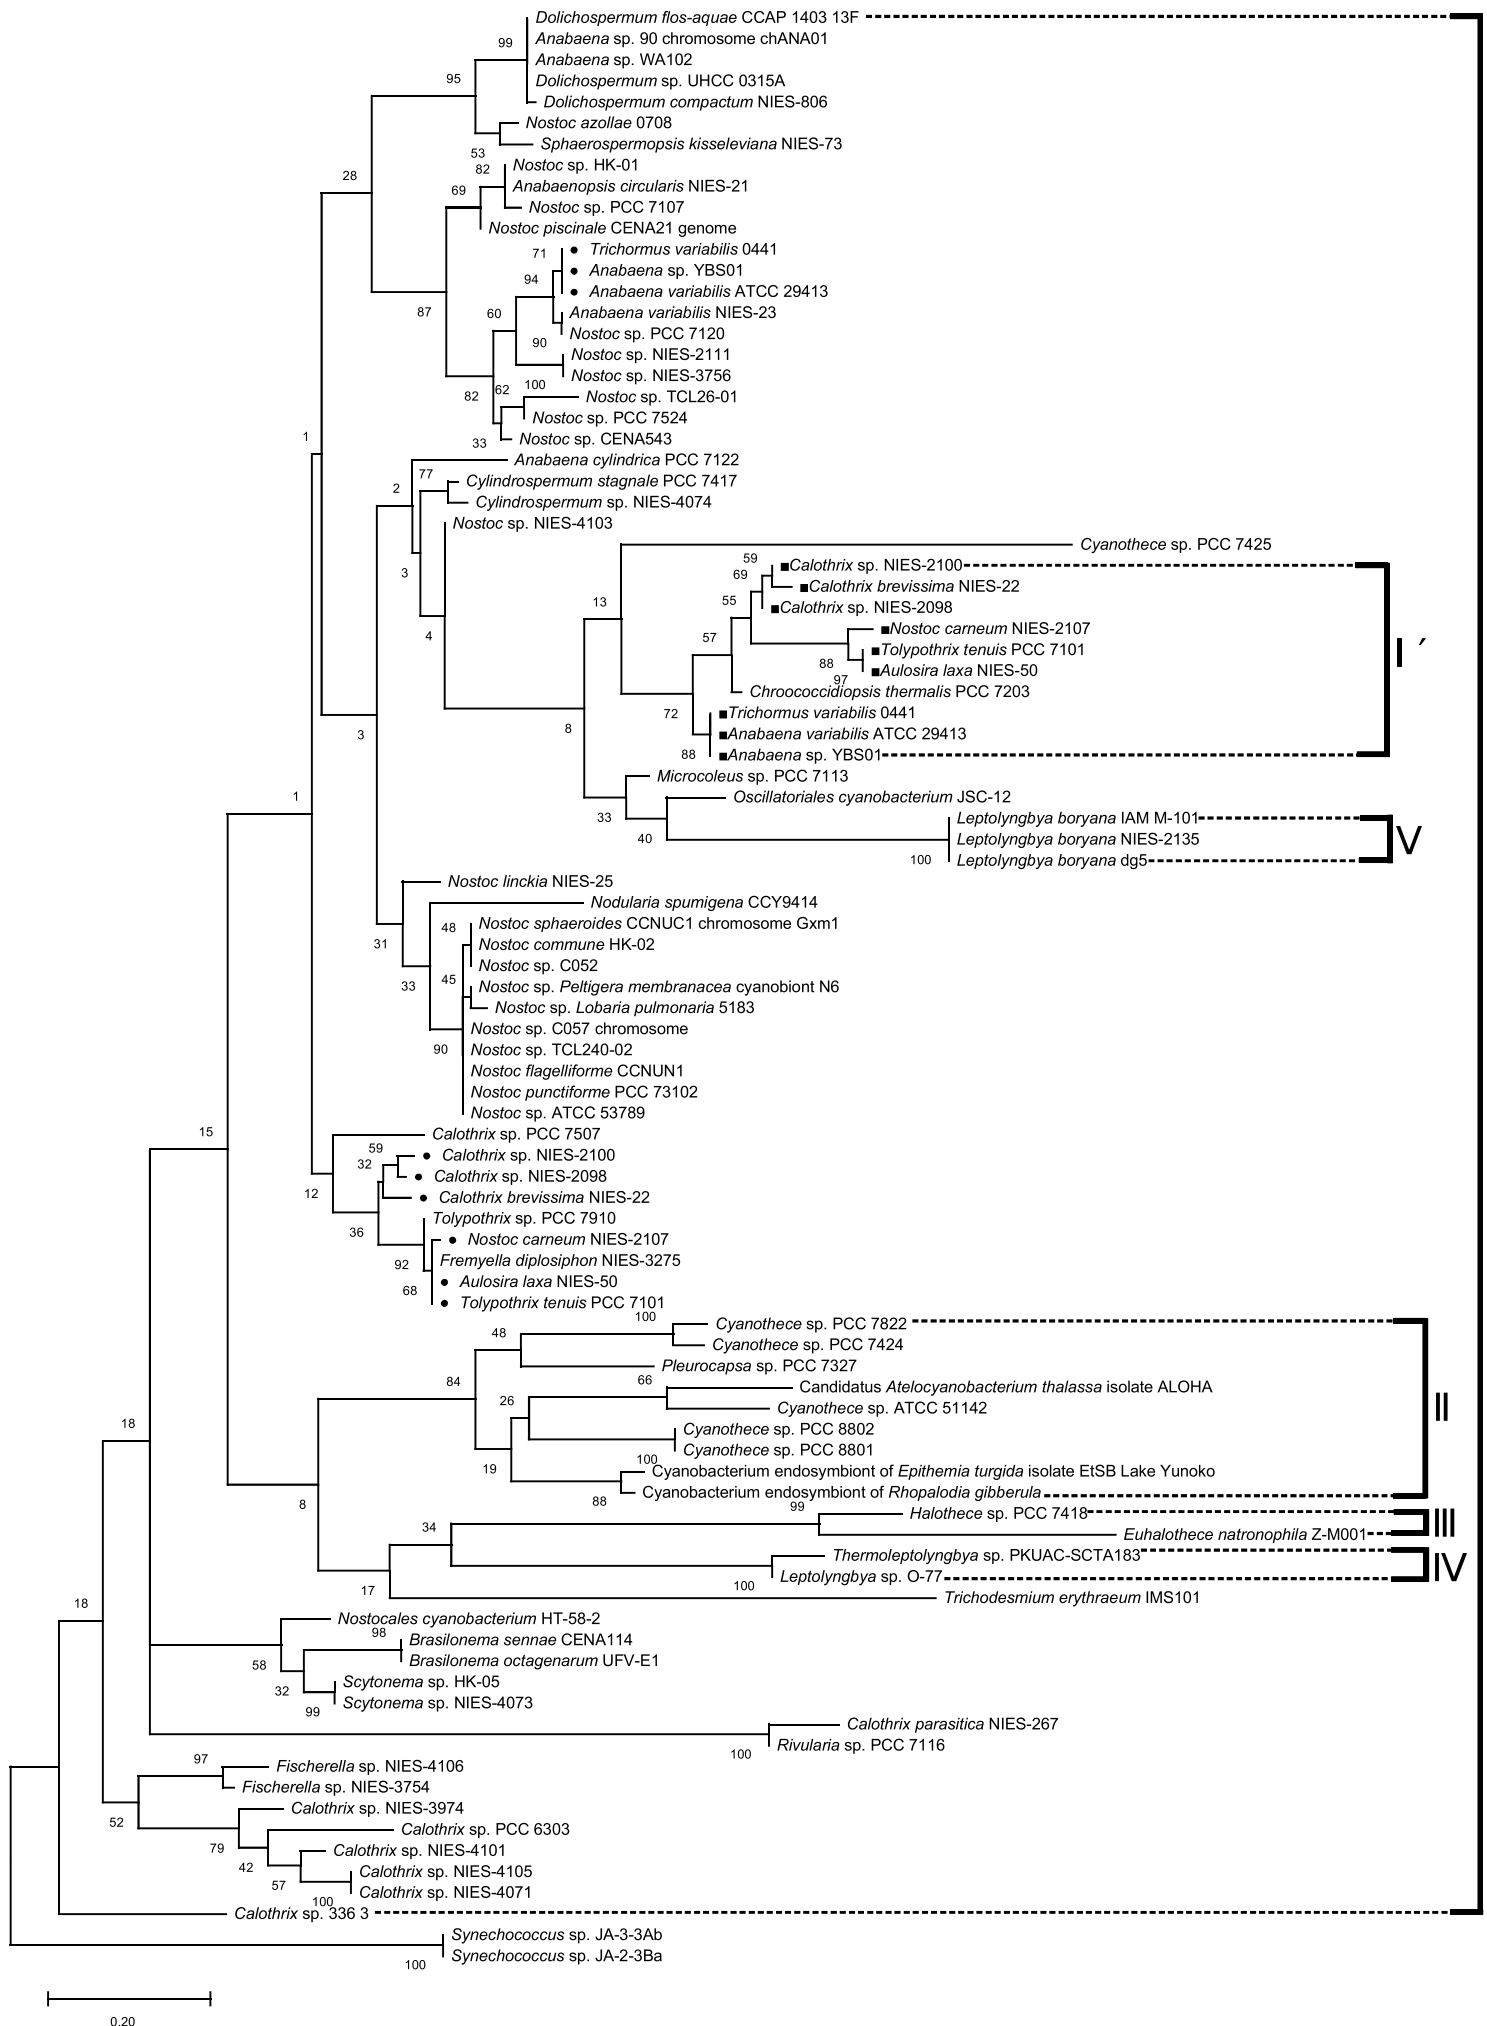

Figure S2h Phylogenetic tree of *nifZ*

Supplement: s1 [file s1]

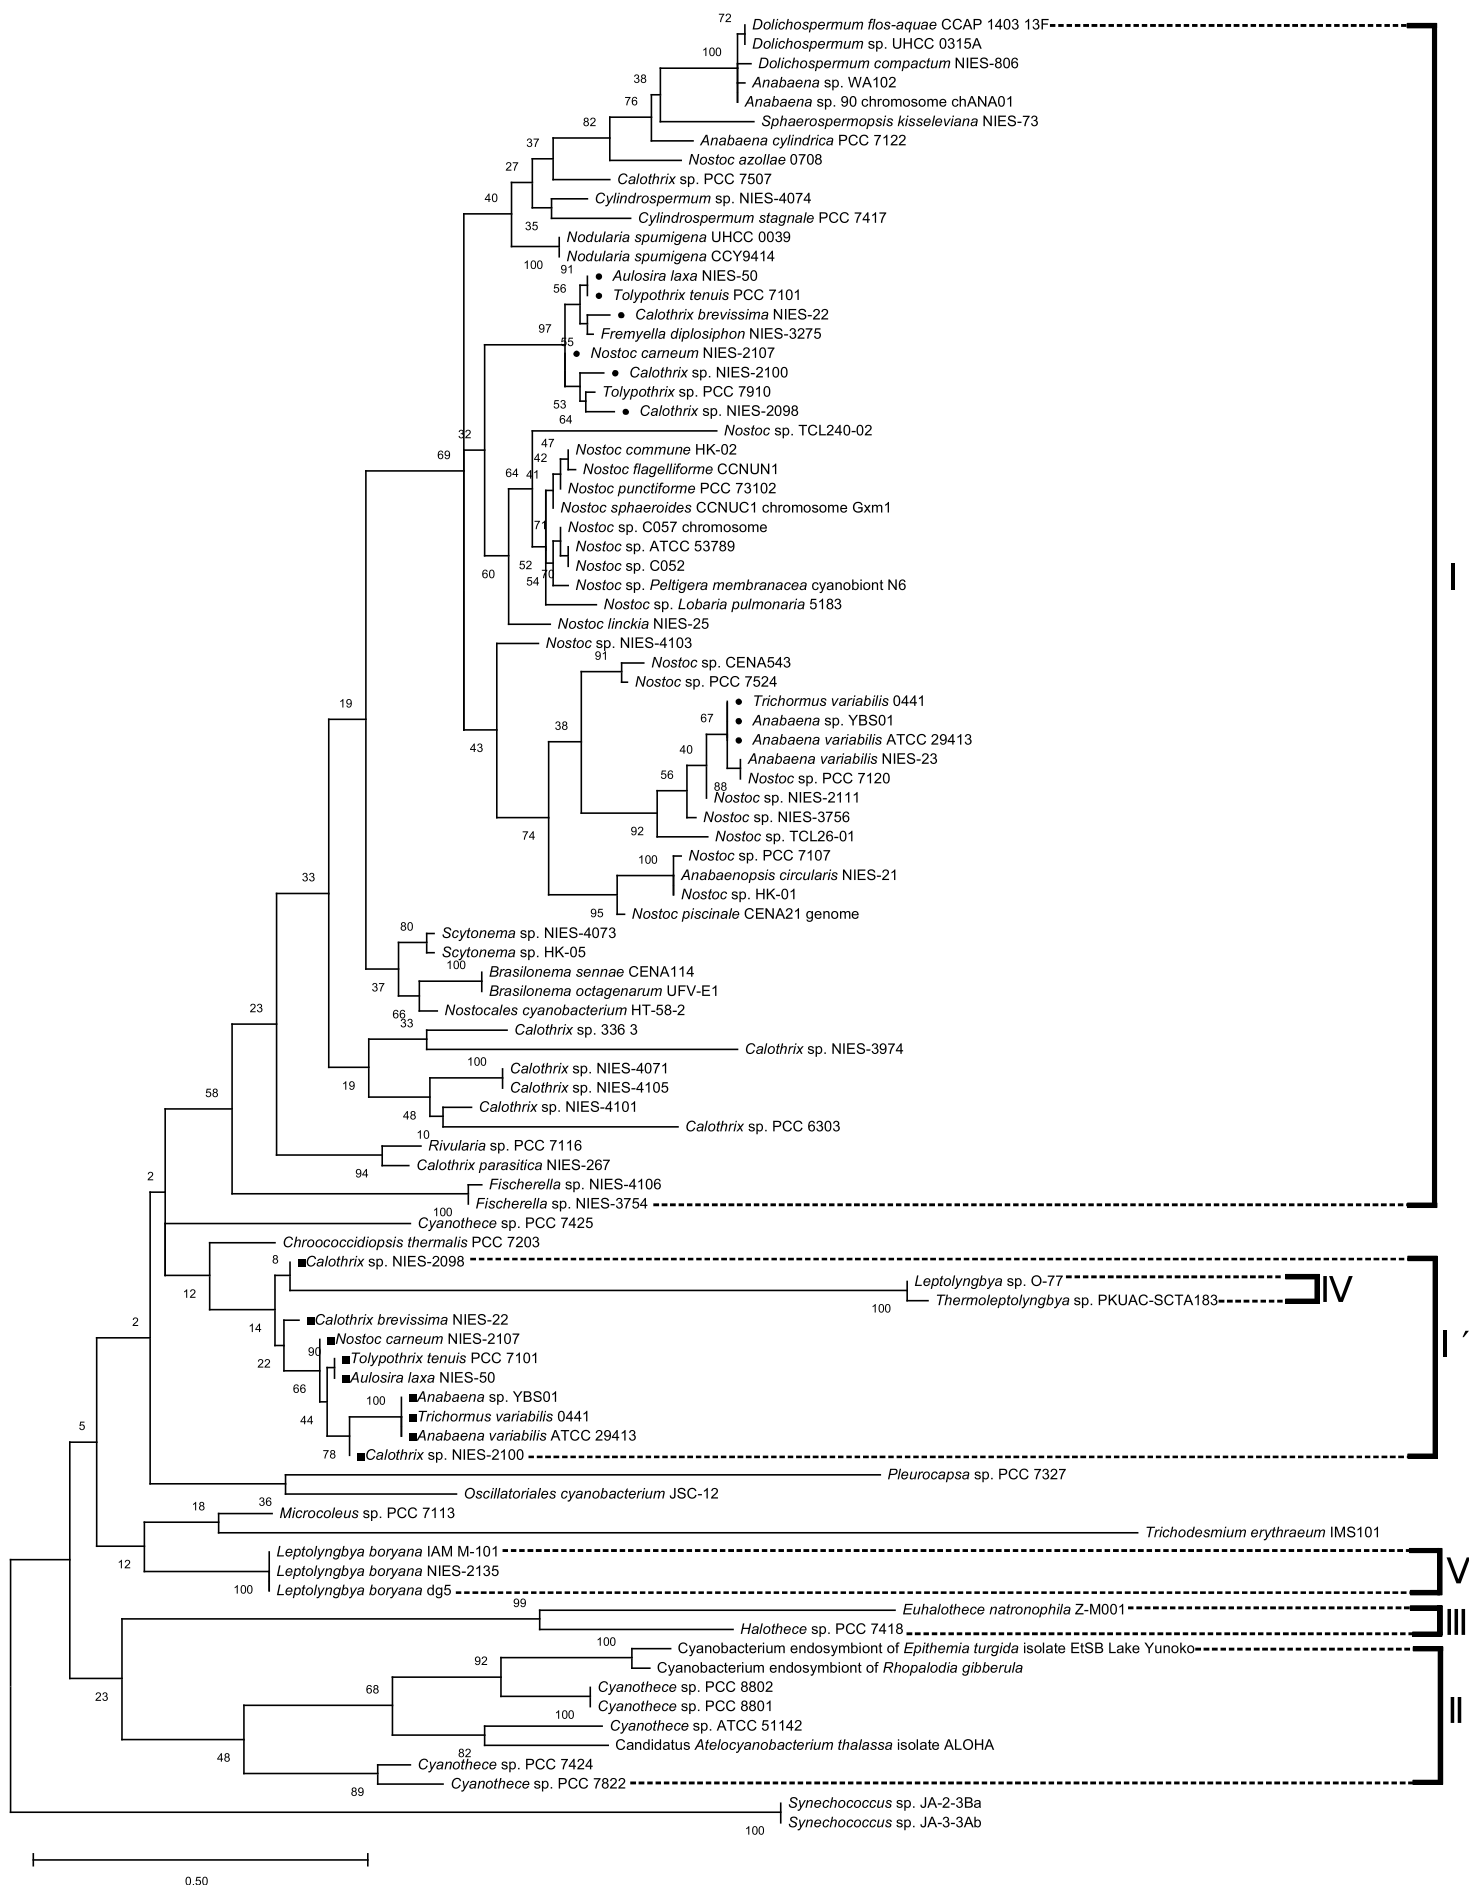

Figure S2l Phylogenetic tree of *nifX*

Supplement: s1 [file s1]

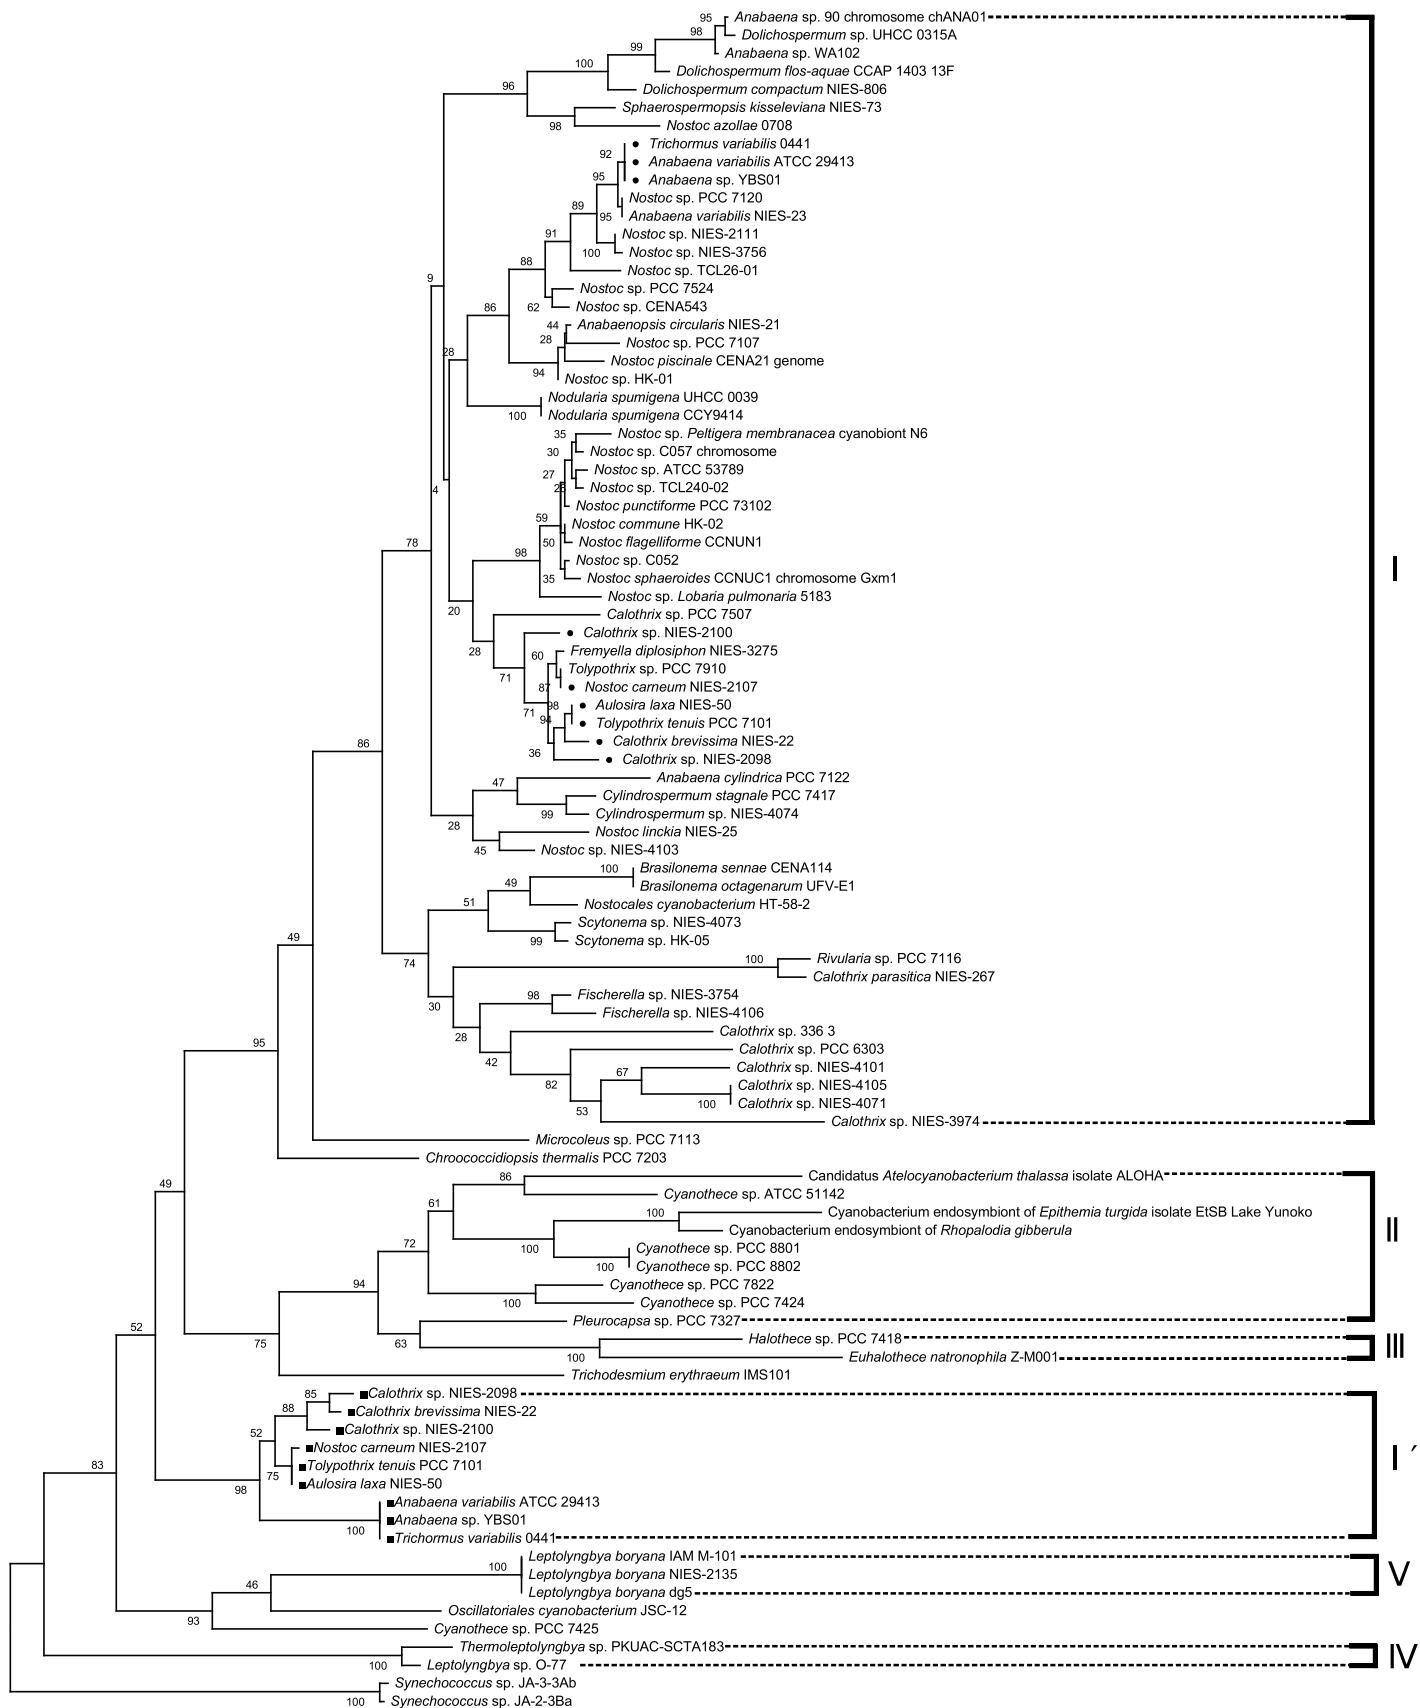

Figure S2b Phylogenetic tree of *nifS*

Supplement: s1 [file s1]

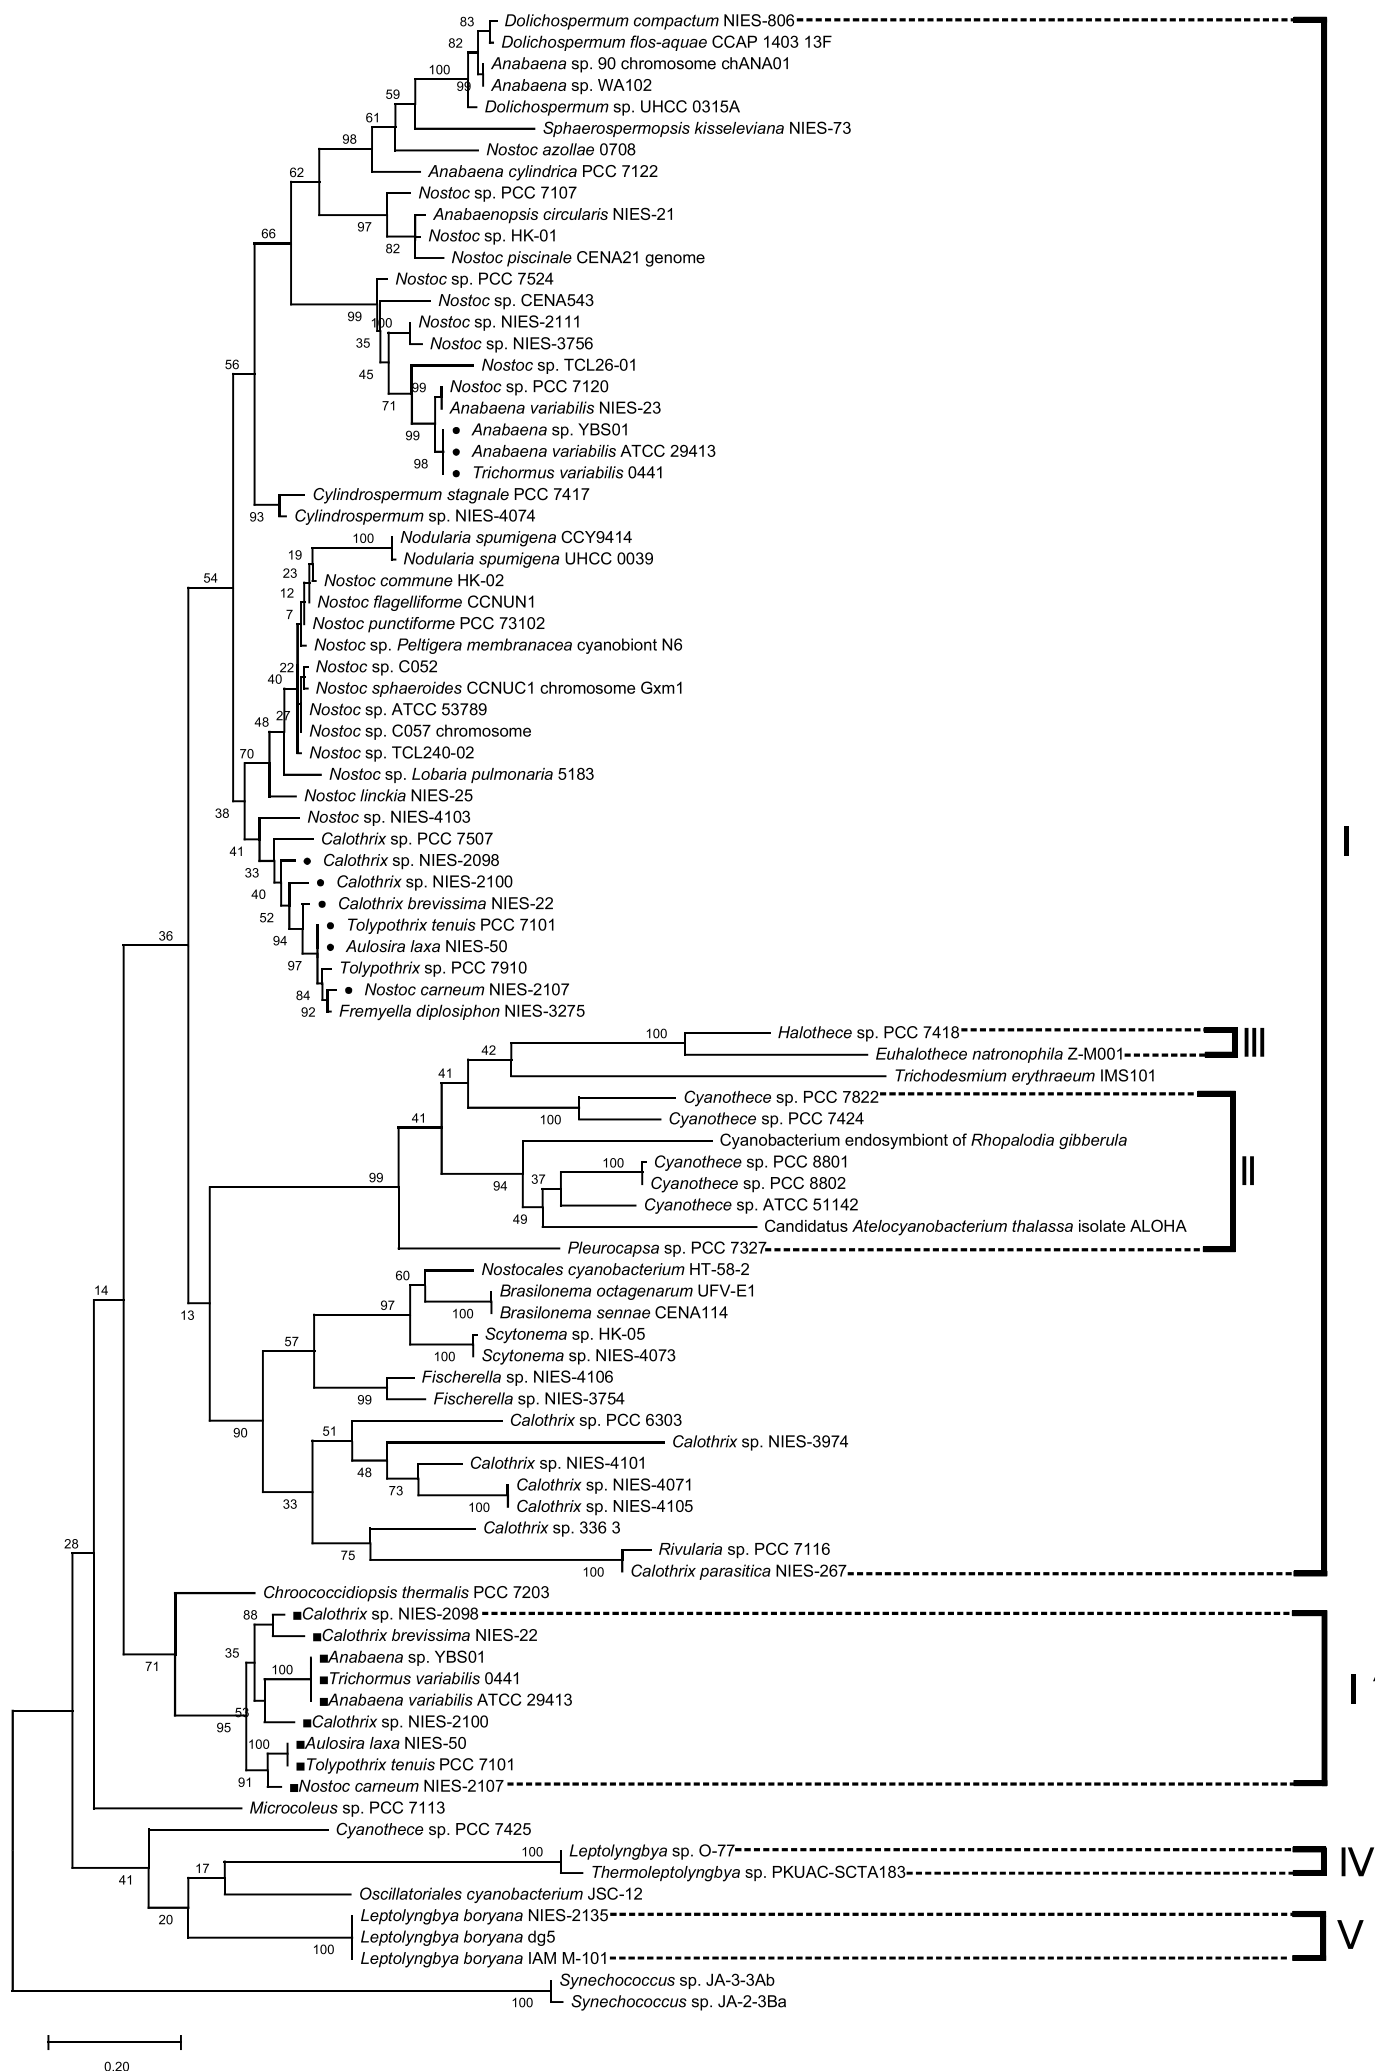

Figure S2c phylogenetic tree of *nifU*

Supplement: s1 [file s1]

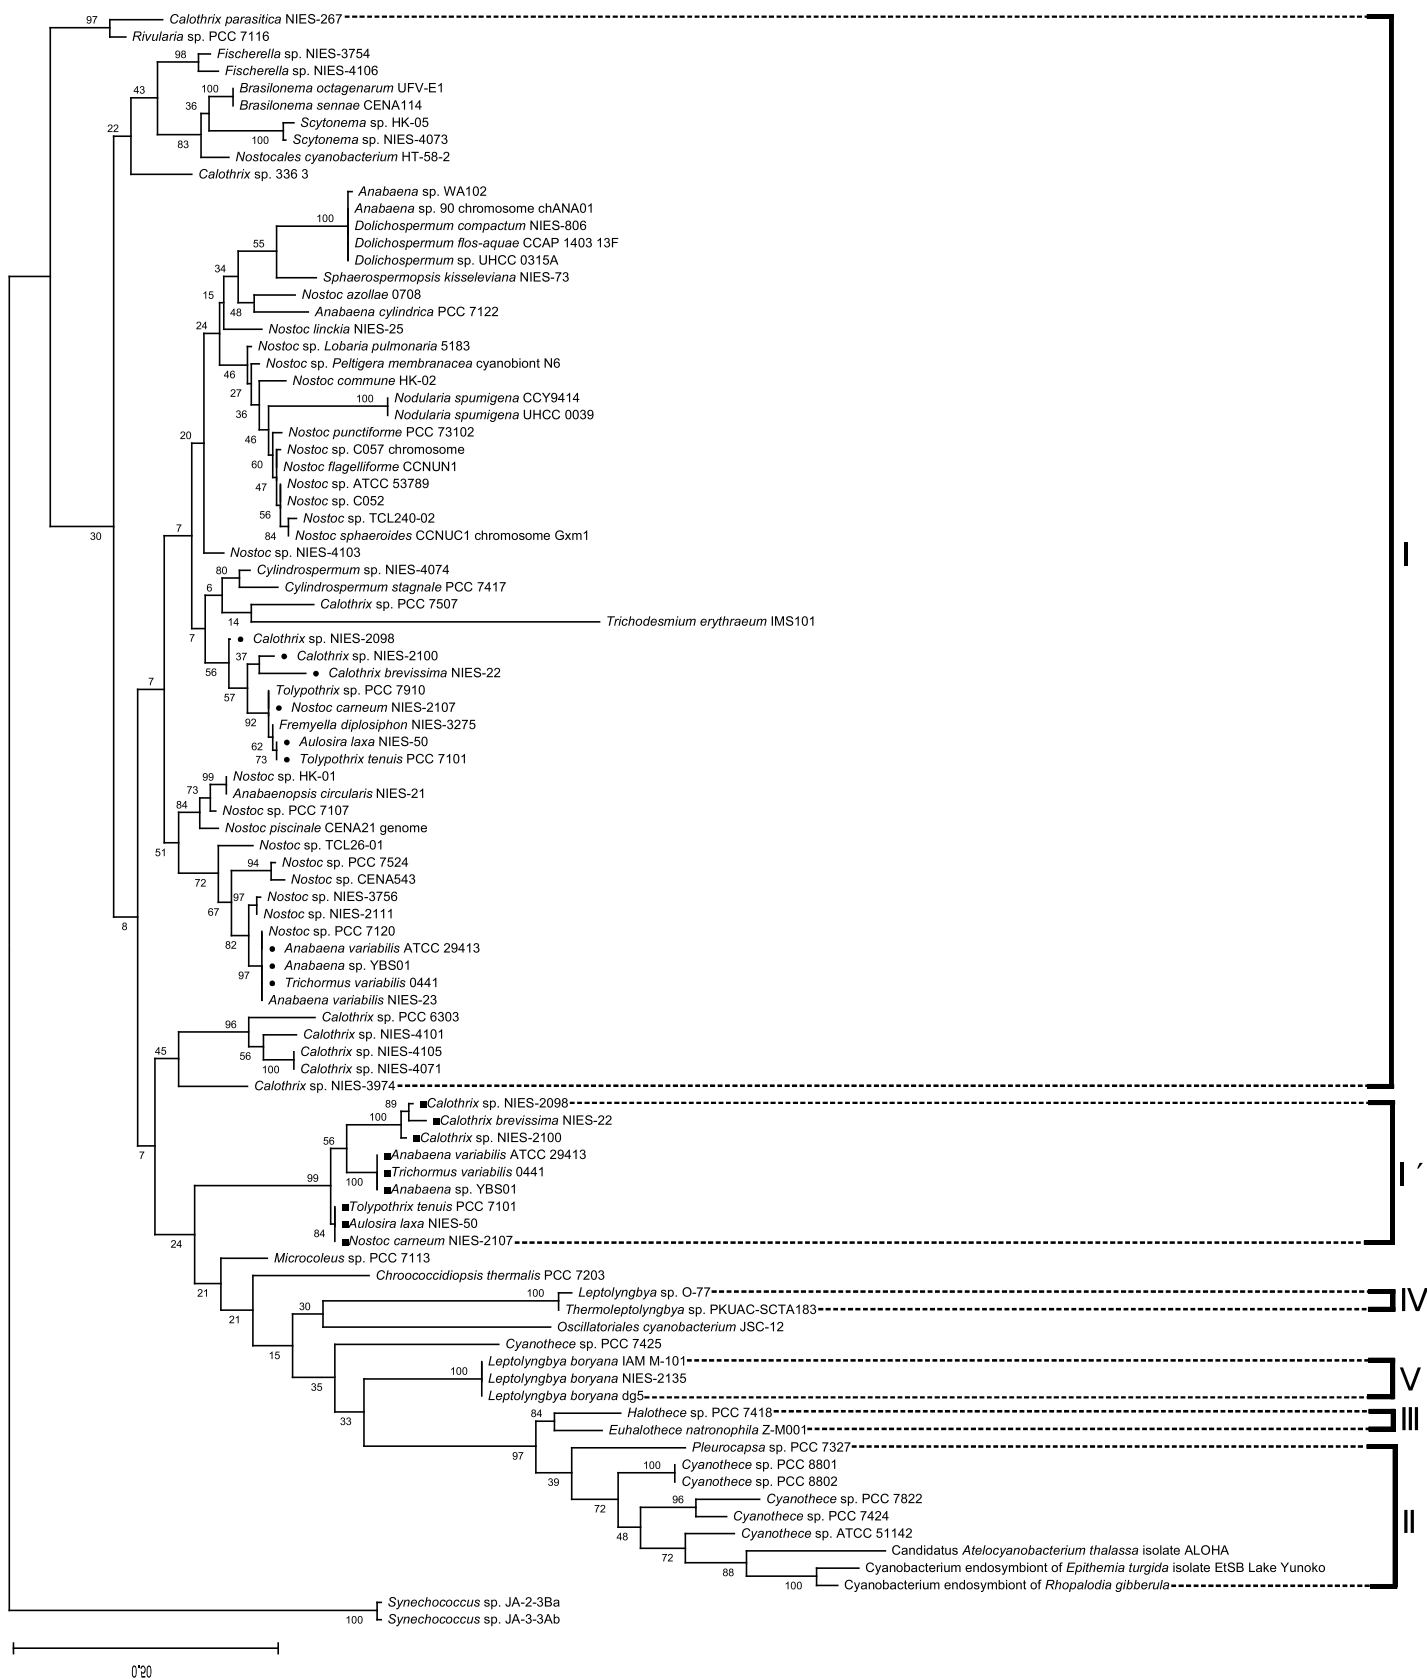

Figure S2m Phylogenetic tree of *nifW*

Supplement: s1 [file s1]

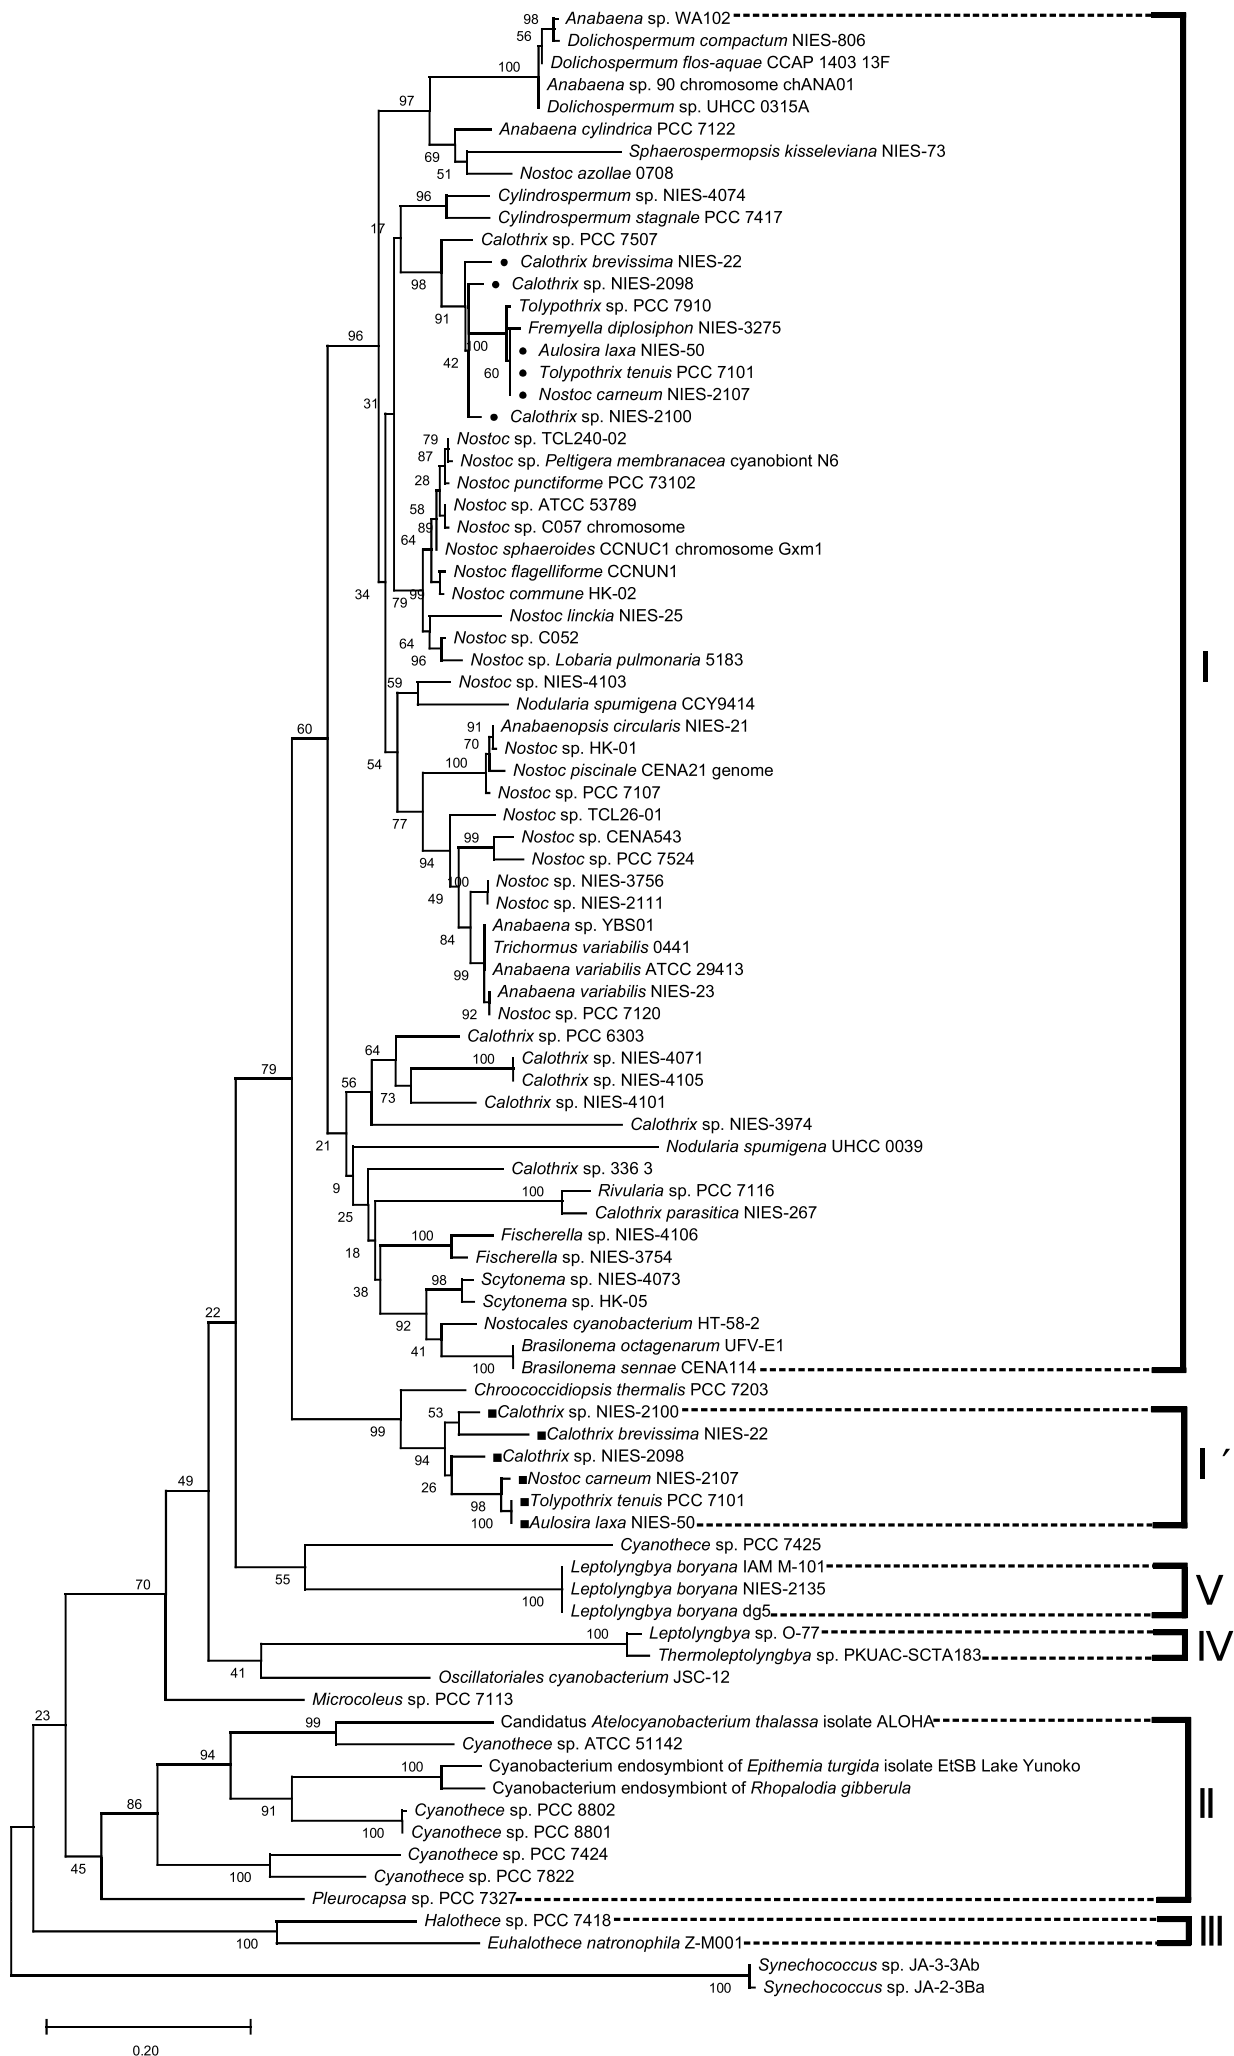

Figure S2g Phylogenetic tree of *nifV*

Supplement: s1 [file s1]

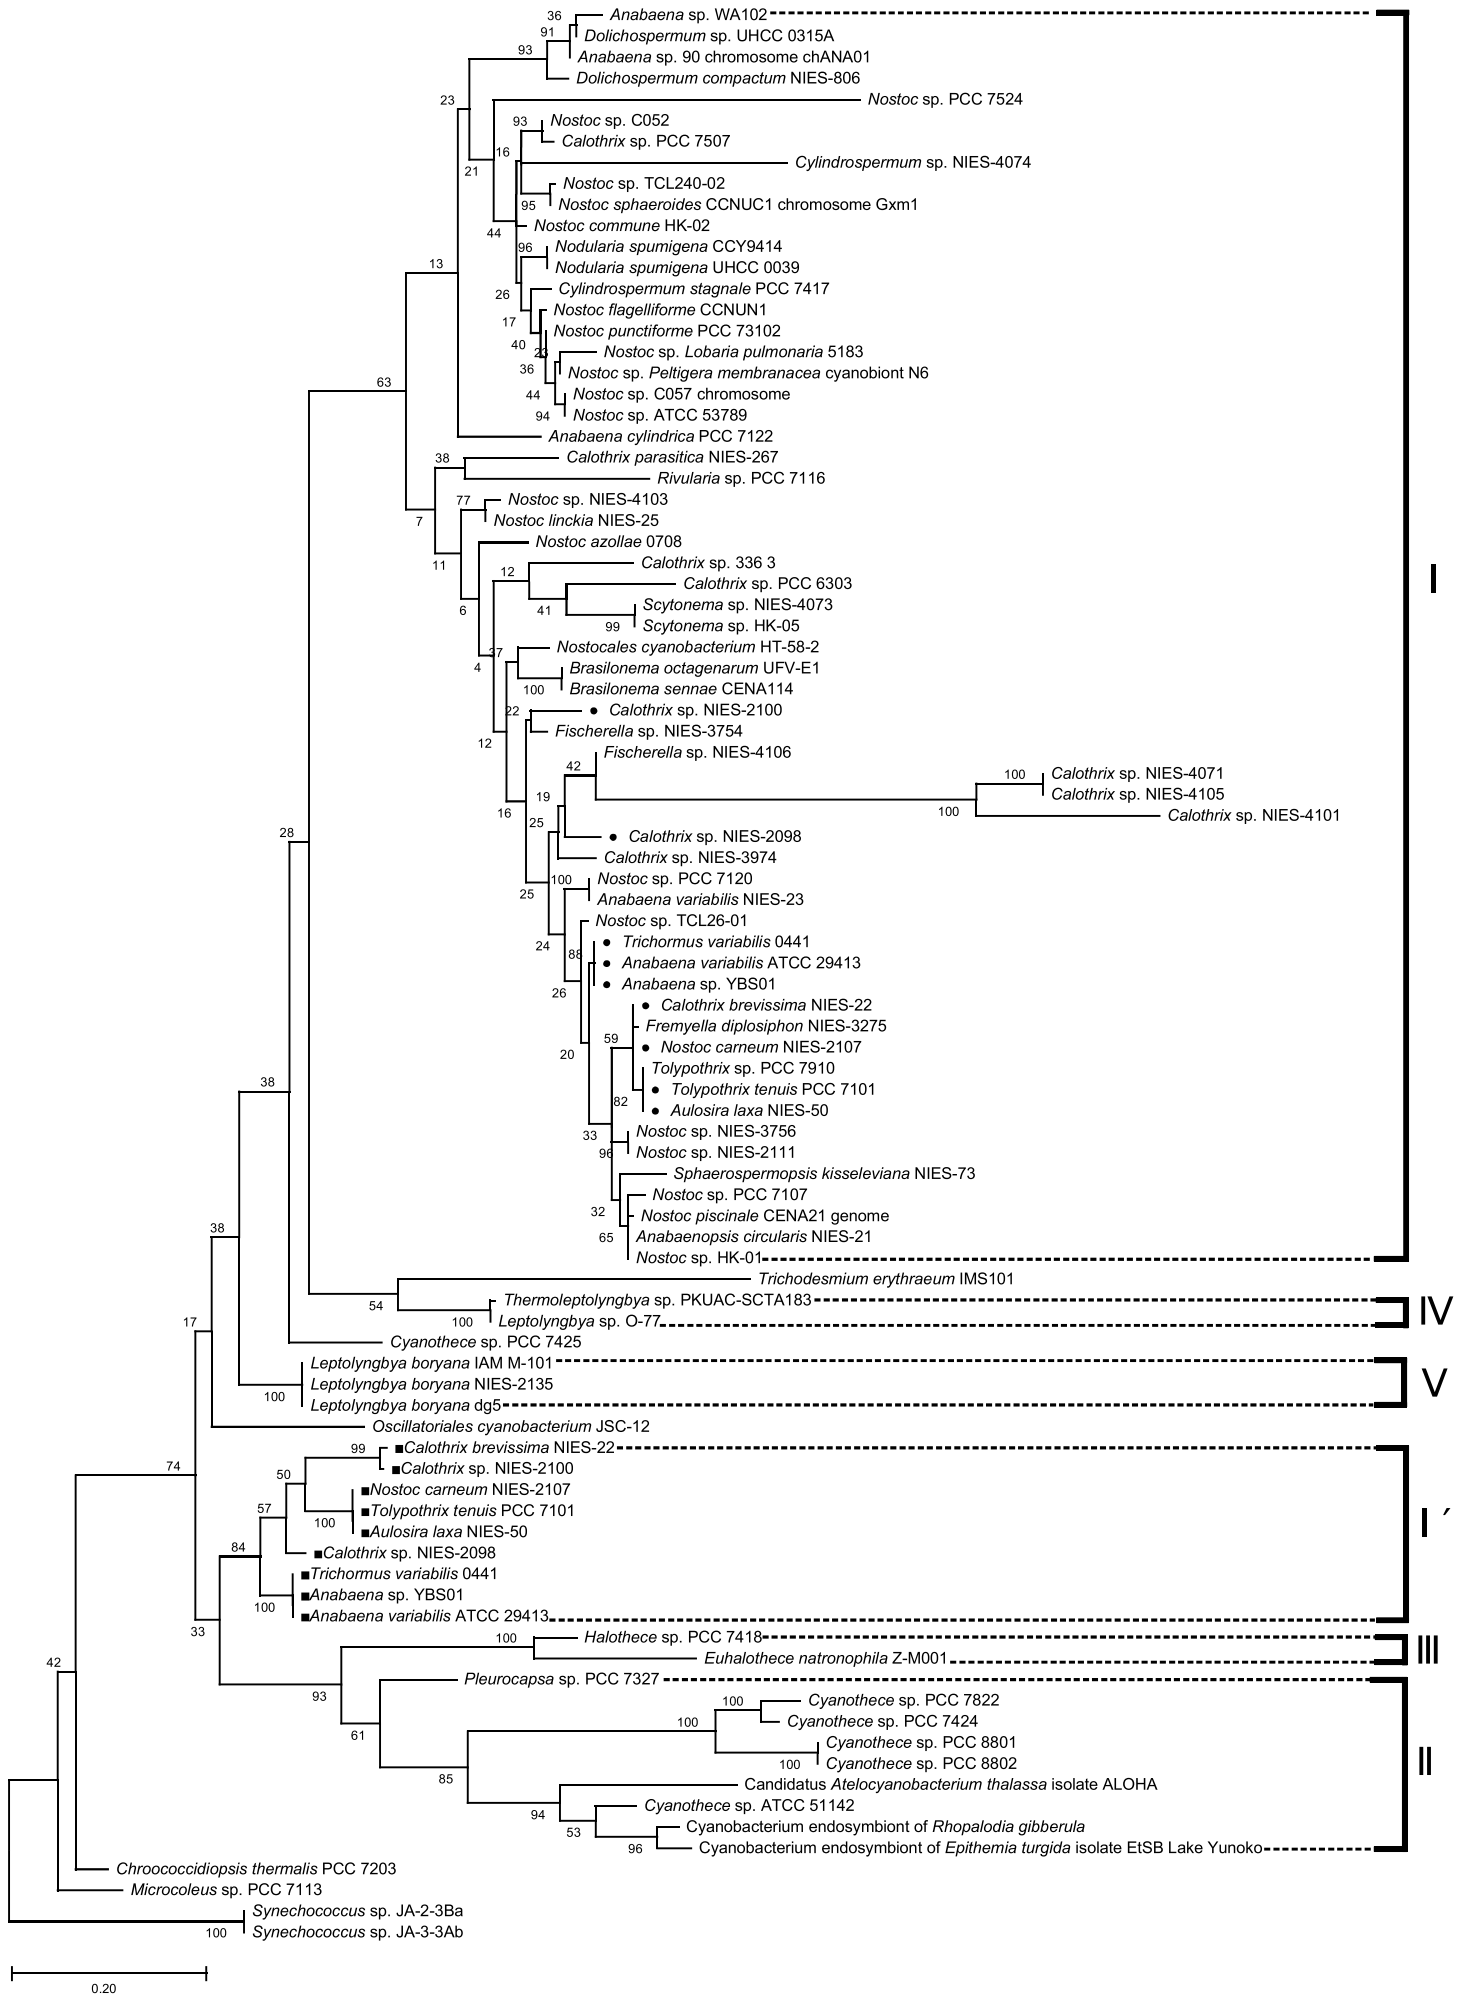

Figure S2d Phylogenetic tree of *nifH*

Supplement: s1 [file s1]

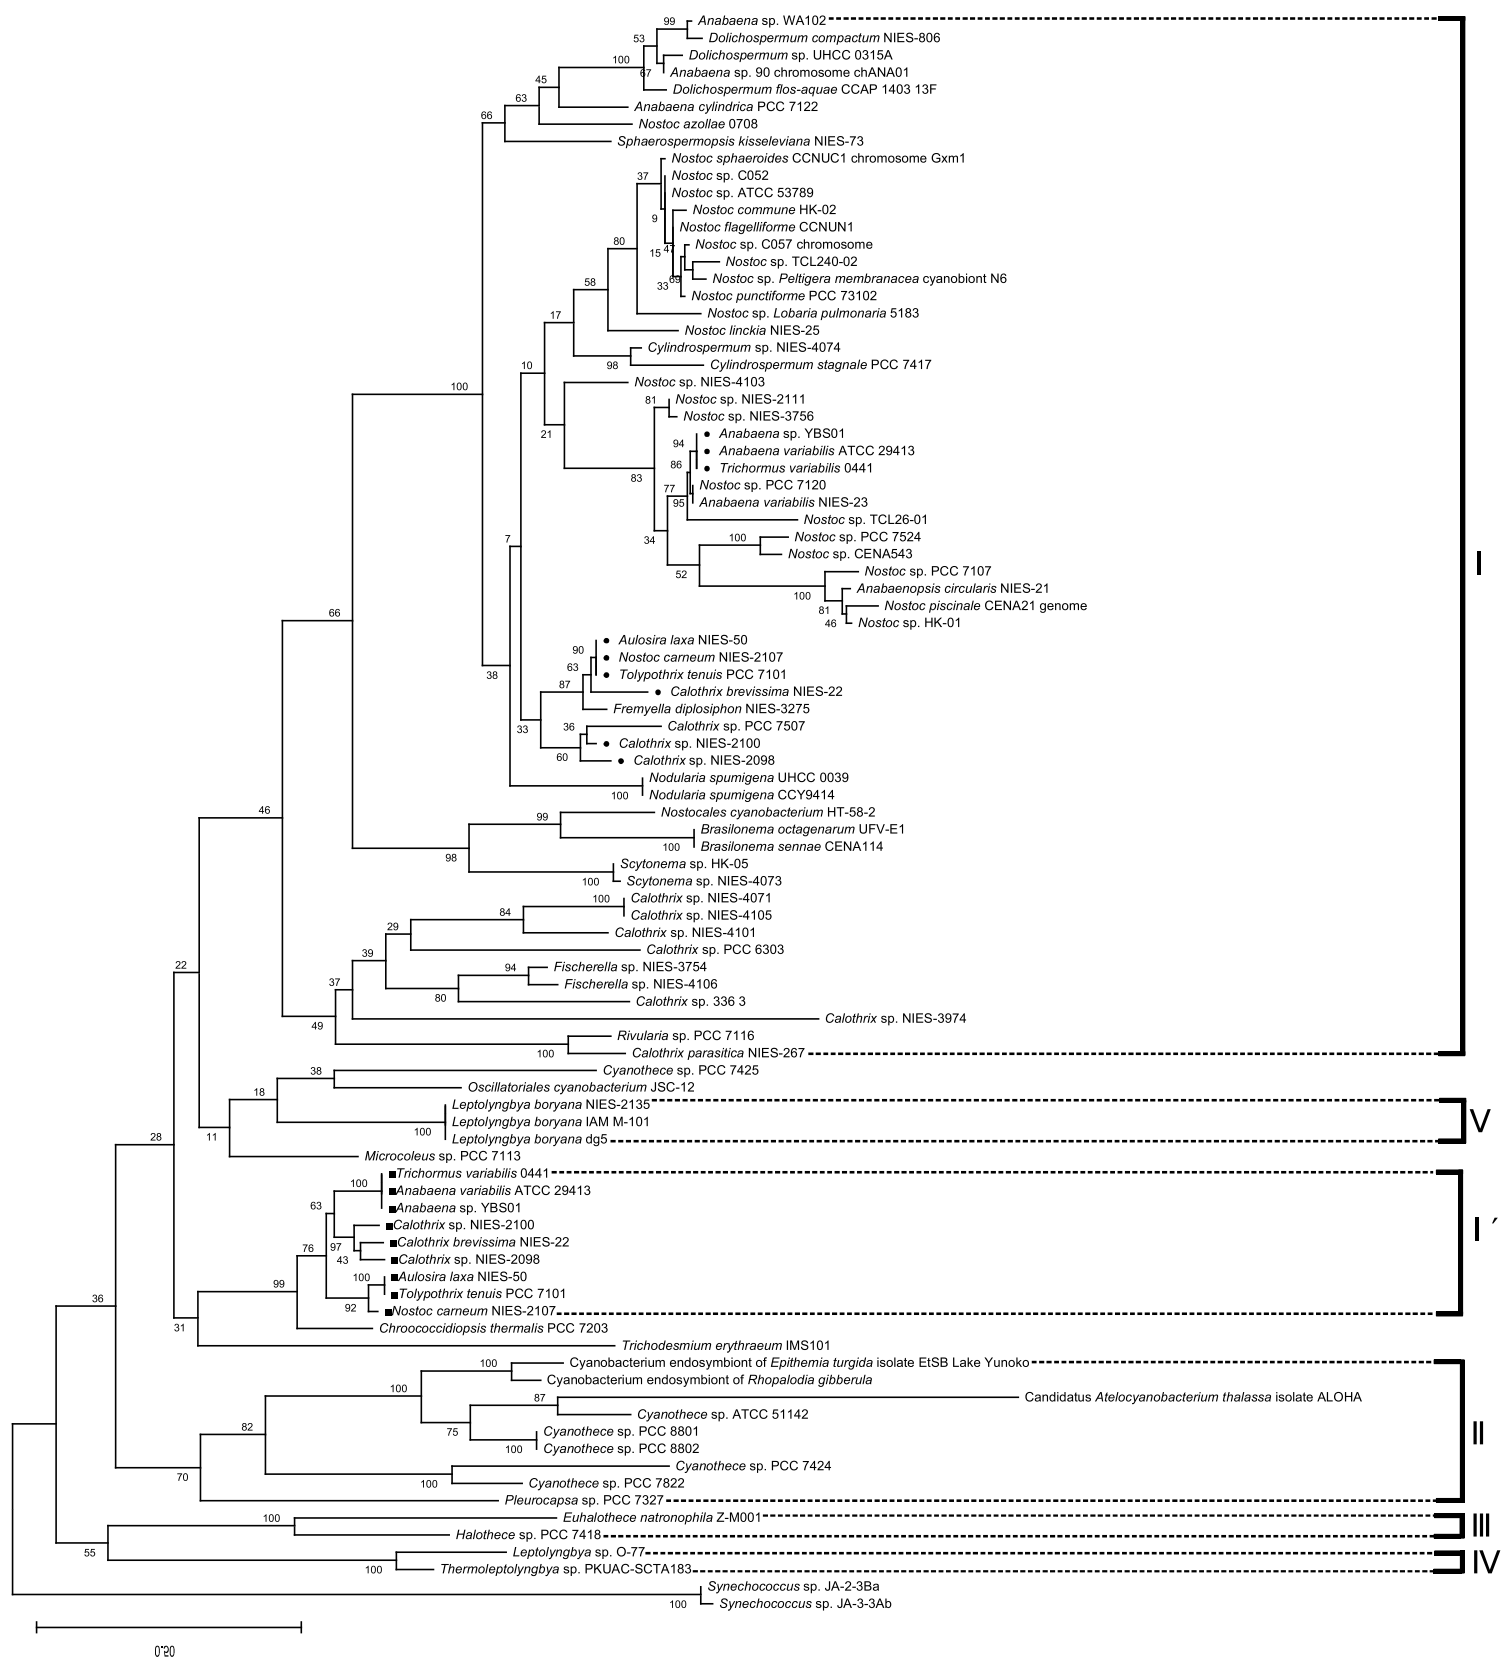

Figure S2j Phylogenetic tree of *nifE*

Supplement: s1 [file s1]

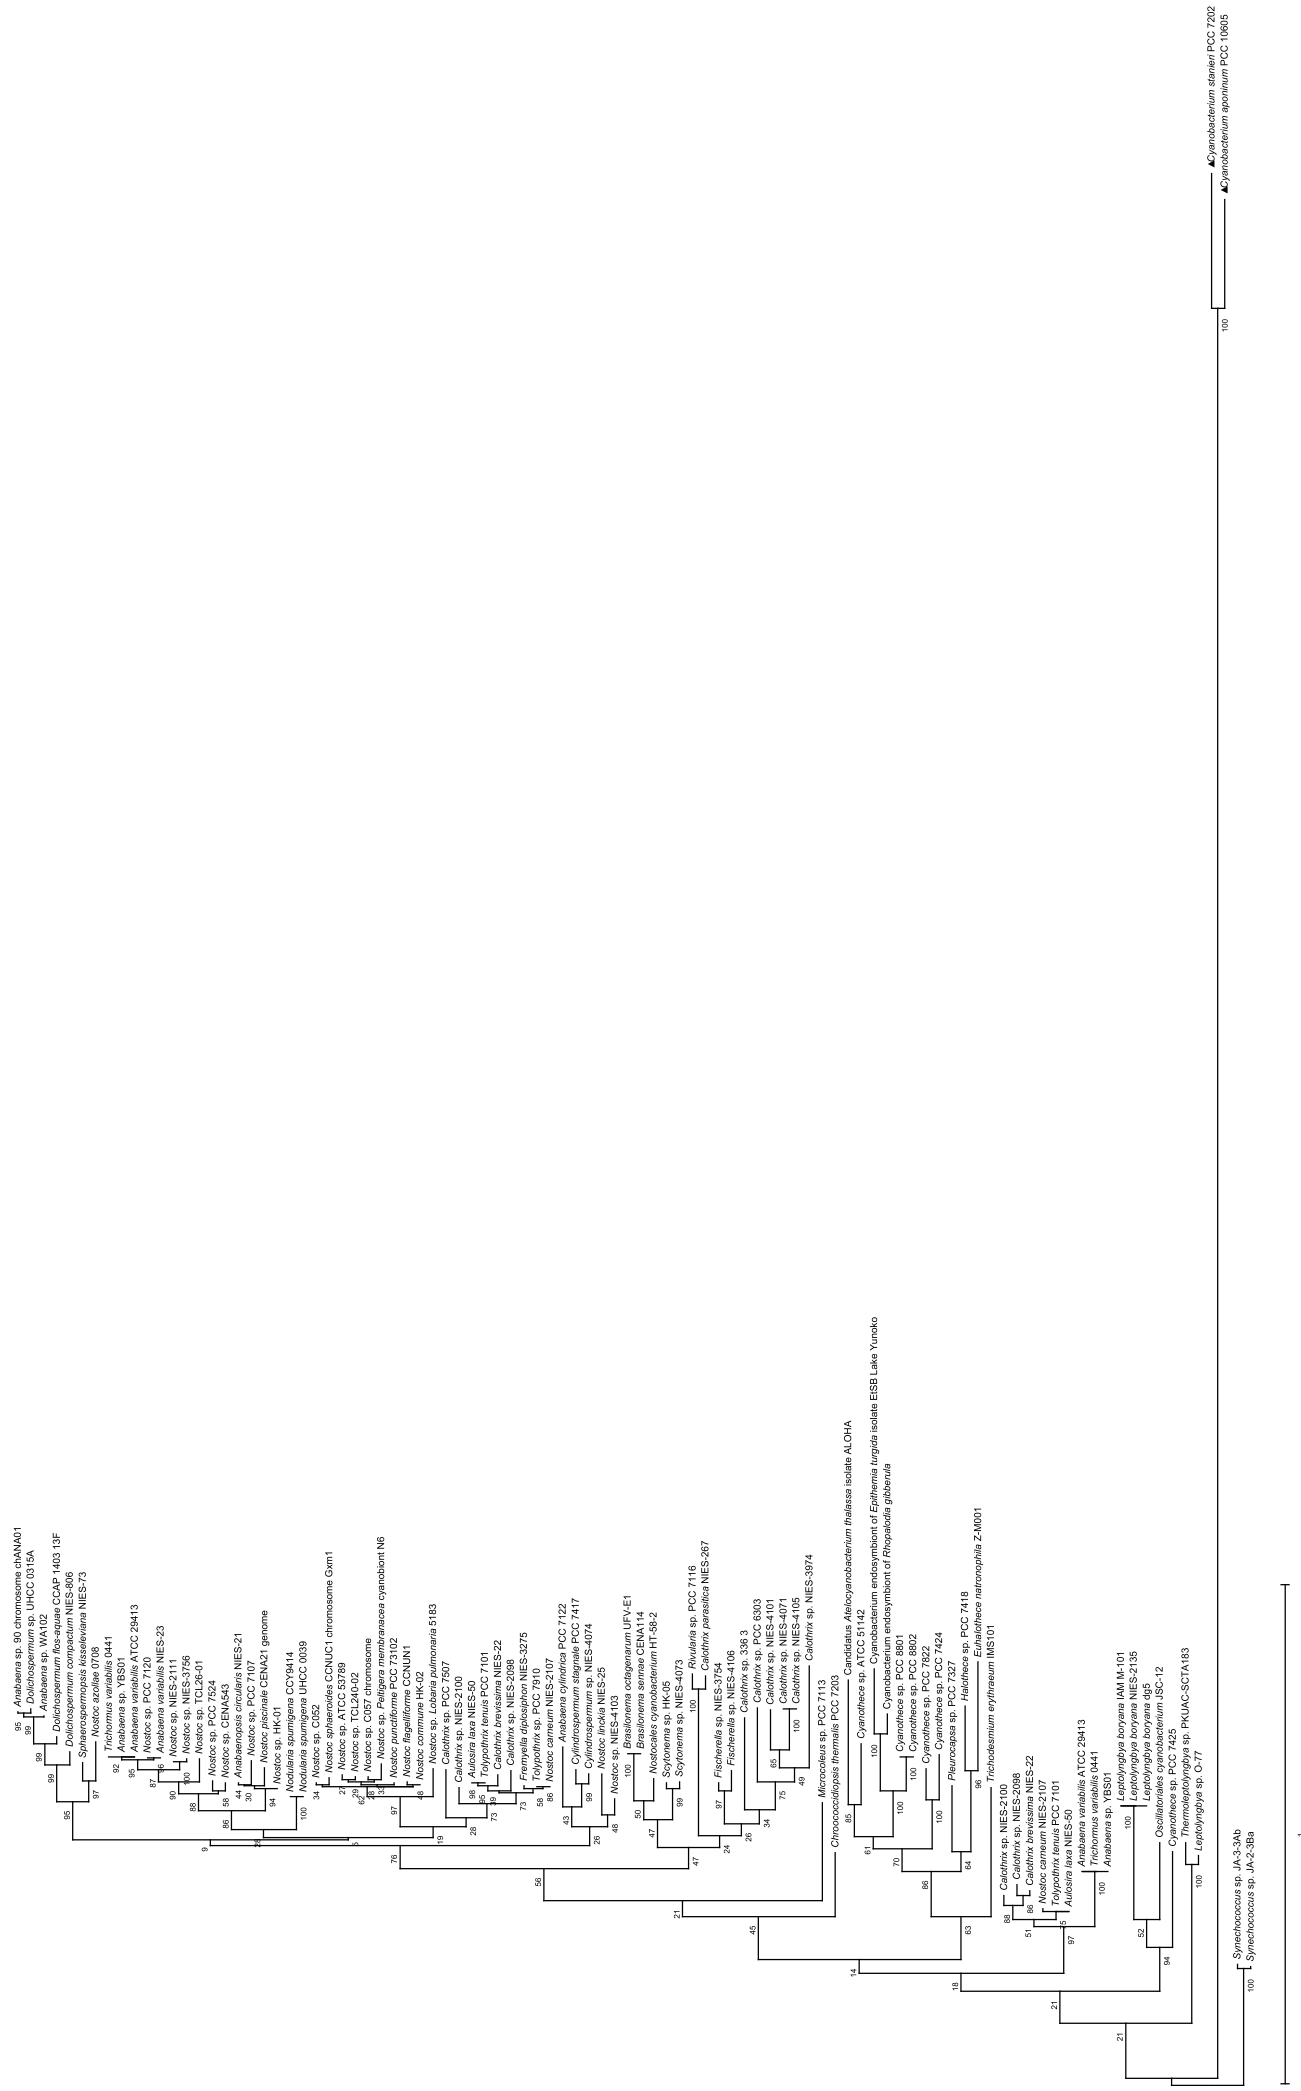

Figure S3a Phylogenetic tree of nifS for diazotrophic and non-diazotrophic Cyanobacteria

Supplement: s1 [file s1]
